# Supplementary material for: Anesthetic Ketamine Impairs Rats' Recall of Previous Information
Source: Oxford University Press journal article supplement (doi:10.1097/aln.0b013e318219524e), 2011-04-11
Supplement: aln_2011_03_14_dalton_201833_sdc1.xls [file aln_2011_03_14_dalton_201833_sdc1.xls]

## Sheet: PSS
Primary CPT Code	CCS Procedure Group	Level of Aggregation for Mortality: 1=CPT Code; 2=CCS Procedure Group; 3=All Others	PSS-Mortality	Level of Aggregation for Morbidity/Mortality: 1=CPT Code; 2=CCS Procedure Group; 3=All Others	PSS-Morbidity
0033T	52 - Aortic resection, replacement or anastomosis	2	91.5079	2	73.897
0034T	52 - Aortic resection, replacement or anastomosis	2	91.5079	2	73.897
0035T	52 - Aortic resection, replacement or anastomosis	2	91.5079	2	73.897
0038T	231 - Other therapeutic procedures	3	81.4145	3	53.5991
0078T	61 - Other OR procedures on vessels other than head and neck	2	86.4124	1	56.516
0079T	61 - Other OR procedures on vessels other than head and neck	2	86.4124	2	60.4039
0080T	61 - Other OR procedures on vessels other than head and neck	2	86.4124	1	45.8794
0081T	61 - Other OR procedures on vessels other than head and neck	2	86.4124	2	60.4039
0090T	154 - Arthroplasty other than hip or knee	2	0	2	23.8582
0092T	154 - Arthroplasty other than hip or knee	2	0	2	23.8582
0093T	162 - Other OR therapeutic procedures on joints	2	68.7867	2	34.5056
0163T	158 - Spinal fusion	2	73.8313	2	44.9475
0165T	158 - Spinal fusion	2	73.8313	2	44.9475
0170T	96 - Other OR lower GI therapeutic procedures	2	78.164	2	46.2243
10120	174 - Other non-OR therapeutic procedures on skin and breast	2	0	2	32.784
10121	174 - Other non-OR therapeutic procedures on skin and breast	1	77.7463	1	36.8755
10140	168 - Incision and drainage, skin and subcutaneous tissue	1	80.0322	1	50.3976
10160	170 - Excision of skin lesion	2	88.4271	1	39.186
10180	168 - Incision and drainage, skin and subcutaneous tissue	1	78.7784	1	48.2869
11000	169 - Debridement of wound, infection or burn	3	81.4145	3	53.5991
11001	169 - Debridement of wound, infection or burn	3	81.4145	1	51.0489
11004	169 - Debridement of wound, infection or burn	1	91.4045	1	74.7317
11005	169 - Debridement of wound, infection or burn	1	85.811	1	69.4683
11006	169 - Debridement of wound, infection or burn	1	95.275	1	83.503
11008	169 - Debridement of wound, infection or burn	1	74.6759	1	51.8175
11960	175 - Other OR therapeutic procedures on skin and breast	2	65.8428	2	35.08
14300	172 - Skin graft	2	72.6316	1	0
15040	172 - Skin graft	2	72.6316	2	42.6963
15115	172 - Skin graft	2	72.6316	2	42.6963
15116	172 - Skin graft	2	72.6316	2	42.6963
15150	172 - Skin graft	2	72.6316	2	42.6963
15155	172 - Skin graft	2	72.6316	2	42.6963
15170	172 - Skin graft	2	72.6316	2	42.6963
15175	172 - Skin graft	2	72.6316	2	42.6963
15200	172 - Skin graft	2	72.6316	2	42.6963
15201	172 - Skin graft	2	72.6316	2	42.6963
15220	172 - Skin graft	1	77.3448	1	36.1196
15221	172 - Skin graft	2	72.6316	2	42.6963
15240	172 - Skin graft	1	0	1	0
15260	172 - Skin graft	2	72.6316	2	42.6963
15261	172 - Skin graft	2	72.6316	2	42.6963
15300	172 - Skin graft	2	72.6316	2	42.6963
15320	172 - Skin graft	2	72.6316	2	42.6963
15330	172 - Skin graft	2	72.6316	2	42.6963
15335	172 - Skin graft	2	72.6316	2	42.6963
15340	172 - Skin graft	2	72.6316	2	42.6963
15350	172 - Skin graft	2	72.6316	2	42.6963
15420	172 - Skin graft	2	72.6316	2	42.6963
15430	172 - Skin graft	2	72.6316	2	42.6963
15570	172 - Skin graft	2	72.6316	2	42.6963
15572	172 - Skin graft	2	72.6316	2	42.6963
15574	172 - Skin graft	2	72.6316	2	42.6963
15576	172 - Skin graft	2	72.6316	2	42.6963
15600	172 - Skin graft	2	72.6316	2	42.6963
15610	172 - Skin graft	2	72.6316	2	42.6963
15620	172 - Skin graft	2	72.6316	2	42.6963
15630	172 - Skin graft	2	72.6316	2	42.6963
15650	172 - Skin graft	2	72.6316	2	42.6963
15731	172 - Skin graft	2	72.6316	1	0
15732	172 - Skin graft	2	72.6316	1	49.1207
15734	172 - Skin graft	1	81.8623	1	56.3034
15736	172 - Skin graft	2	72.6316	2	42.6963
15738	172 - Skin graft	1	83.0173	1	47.9394
15740	175 - Other OR therapeutic procedures on skin and breast	2	65.8428	2	35.08
15750	9 - Other OR therapeutic nervous system procedures	2	78.7796	2	42.8715
15756	172 - Skin graft	2	72.6316	1	64.612
15757	172 - Skin graft	2	72.6316	2	42.6963
15758	172 - Skin graft	2	72.6316	2	42.6963
15760	172 - Skin graft	2	72.6316	2	42.6963
15830	175 - Other OR therapeutic procedures on skin and breast	1	78.0298	1	44.8494
15840	172 - Skin graft	2	72.6316	2	42.6963
15842	172 - Skin graft	2	72.6316	2	42.6963
15847	175 - Other OR therapeutic procedures on skin and breast	1	0	1	27.9827
15876	175 - Other OR therapeutic procedures on skin and breast	2	65.8428	2	35.08
15877	175 - Other OR therapeutic procedures on skin and breast	2	65.8428	2	35.08
15878	175 - Other OR therapeutic procedures on skin and breast	2	65.8428	2	35.08
15879	175 - Other OR therapeutic procedures on skin and breast	2	65.8428	2	35.08
15920	142 - Partial excision bone	2	77.1496	2	45.6248
15922	142 - Partial excision bone	2	77.1496	2	45.6248
15931	170 - Excision of skin lesion	2	88.4271	1	74.7215
15933	142 - Partial excision bone	2	77.1496	2	45.6248
15934	170 - Excision of skin lesion	2	88.4271	2	43.9092
15935	142 - Partial excision bone	2	77.1496	2	45.6248
15936	170 - Excision of skin lesion	2	88.4271	1	78.7781
15937	142 - Partial excision bone	2	77.1496	2	45.6248
15940	170 - Excision of skin lesion	2	88.4271	2	43.9092
15941	142 - Partial excision bone	2	77.1496	2	45.6248
15944	170 - Excision of skin lesion	2	88.4271	2	43.9092
15945	142 - Partial excision bone	2	77.1496	2	45.6248
15946	142 - Partial excision bone	2	77.1496	1	51.5807
15950	170 - Excision of skin lesion	2	88.4271	2	43.9092
15952	170 - Excision of skin lesion	2	88.4271	2	43.9092
15953	142 - Partial excision bone	2	77.1496	2	45.6248
15956	170 - Excision of skin lesion	2	88.4271	2	43.9092
15958	142 - Partial excision bone	2	77.1496	2	45.6248
15999	170 - Excision of skin lesion	2	88.4271	1	53.529
16010	169 - Debridement of wound, infection or burn	3	81.4145	3	53.5991
17000	170 - Excision of skin lesion	2	88.4271	2	43.9092
17110	170 - Excision of skin lesion	2	88.4271	2	43.9092
17111	170 - Excision of skin lesion	2	88.4271	2	43.9092
17276	170 - Excision of skin lesion	2	88.4271	2	43.9092
19020	175 - Other OR therapeutic procedures on skin and breast	1	0	1	30.2253
19110	174 - Other non-OR therapeutic procedures on skin and breast	1	0	1	0
19112	175 - Other OR therapeutic procedures on skin and breast	2	65.8428	2	35.08
19120	166 - Lumpectomy, quadrantectomy of breast	1	60.3974	1	14.9846
19125	166 - Lumpectomy, quadrantectomy of breast	1	54.6188	1	13.4177
19126	166 - Lumpectomy, quadrantectomy of breast	3	81.4145	1	0
19140	175 - Other OR therapeutic procedures on skin and breast	2	65.8428	1	0
19160	166 - Lumpectomy, quadrantectomy of breast	1	0	1	16.7244
19162	166 - Lumpectomy, quadrantectomy of breast	1	62.4265	1	16.8709
19180	167 - Mastectomy	1	58.9842	1	26.0247
19182	167 - Mastectomy	1	0	1	23.6948
19200	167 - Mastectomy	1	74.8002	1	31.5957
19220	167 - Mastectomy	3	81.4145	1	0
19240	167 - Mastectomy	1	60.6389	1	22.8047
19260	142 - Partial excision bone	2	77.1496	1	33.2394
19271	142 - Partial excision bone	2	77.1496	2	45.6248
19272	142 - Partial excision bone	2	77.1496	2	45.6248
19296	175 - Other OR therapeutic procedures on skin and breast	1	0	1	0
19297	166 - Lumpectomy, quadrantectomy of breast	3	81.4145	3	53.5991
19298	175 - Other OR therapeutic procedures on skin and breast	2	65.8428	2	35.08
19300	167 - Mastectomy	1	0	1	0
19301	166 - Lumpectomy, quadrantectomy of breast	1	59.7287	1	17.6256
19302	166 - Lumpectomy, quadrantectomy of breast	1	0	1	16.6262
19303	167 - Mastectomy	1	62.3835	1	27.176
19304	167 - Mastectomy	1	0	1	29.2058
19305	167 - Mastectomy	1	71.864	1	30.8149
19306	167 - Mastectomy	1	0	1	24.0263
19307	167 - Mastectomy	1	63.828	1	27.0736
19316	175 - Other OR therapeutic procedures on skin and breast	1	71.909	1	18.7116
19318	175 - Other OR therapeutic procedures on skin and breast	1	0	1	19.7903
19324	175 - Other OR therapeutic procedures on skin and breast	2	65.8428	2	35.08
19325	175 - Other OR therapeutic procedures on skin and breast	1	0	1	0
19328	175 - Other OR therapeutic procedures on skin and breast	1	0	1	0
19330	175 - Other OR therapeutic procedures on skin and breast	2	65.8428	1	0
19340	175 - Other OR therapeutic procedures on skin and breast	1	0	1	0
19342	175 - Other OR therapeutic procedures on skin and breast	1	0	1	0
19350	175 - Other OR therapeutic procedures on skin and breast	1	0	1	0
19355	175 - Other OR therapeutic procedures on skin and breast	2	65.8428	2	35.08
19357	175 - Other OR therapeutic procedures on skin and breast	1	0	1	22.2099
19361	175 - Other OR therapeutic procedures on skin and breast	2	65.8428	1	28.5539
19364	175 - Other OR therapeutic procedures on skin and breast	2	65.8428	2	35.08
19366	175 - Other OR therapeutic procedures on skin and breast	2	65.8428	2	35.08
19367	175 - Other OR therapeutic procedures on skin and breast	1	0	1	33.9445
19368	175 - Other OR therapeutic procedures on skin and breast	2	65.8428	2	35.08
19369	175 - Other OR therapeutic procedures on skin and breast	2	65.8428	2	35.08
19370	175 - Other OR therapeutic procedures on skin and breast	2	65.8428	1	0
19371	175 - Other OR therapeutic procedures on skin and breast	1	0	1	0
19380	175 - Other OR therapeutic procedures on skin and breast	1	0	1	18.2072
19499	175 - Other OR therapeutic procedures on skin and breast	2	65.8428	1	30.2712
20000	168 - Incision and drainage, skin and subcutaneous tissue	2	0	1	41.9447
20005	164 - Other OR therapeutic procedures on musculoskeletal system	1	0	1	42.486
20100	175 - Other OR therapeutic procedures on skin and breast	2	65.8428	2	35.08
20101	175 - Other OR therapeutic procedures on skin and breast	2	65.8428	2	35.08
20102	175 - Other OR therapeutic procedures on skin and breast	2	65.8428	1	52.847
20103	175 - Other OR therapeutic procedures on skin and breast	2	65.8428	1	29.8536
20605	155 - Arthrocentesis	3	81.4145	3	53.5991
20610	155 - Arthrocentesis	3	81.4145	3	53.5991
20615	161 - Other OR therapeutic procedures on bone	2	76.9324	2	42.6057
20650	214 - Traction, splints, and other wound care	3	81.4145	3	53.5991
20690	161 - Other OR therapeutic procedures on bone	2	76.9324	2	42.6057
20693	161 - Other OR therapeutic procedures on bone	2	76.9324	2	42.6057
20816	164 - Other OR therapeutic procedures on musculoskeletal system	2	82.2172	2	49.8356
20824	164 - Other OR therapeutic procedures on musculoskeletal system	2	82.2172	2	49.8356
20900	161 - Other OR therapeutic procedures on bone	2	76.9324	2	42.6057
20902	161 - Other OR therapeutic procedures on bone	2	76.9324	2	42.6057
20910	164 - Other OR therapeutic procedures on musculoskeletal system	2	82.2172	2	49.8356
20922	160 - Other therapeutic procedures on muscles and tendons	2	78.8362	2	44.617
20926	175 - Other OR therapeutic procedures on skin and breast	2	65.8428	1	0
20930	161 - Other OR therapeutic procedures on bone	2	76.9324	2	42.6057
20931	161 - Other OR therapeutic procedures on bone	2	76.9324	2	42.6057
20936	161 - Other OR therapeutic procedures on bone	2	76.9324	2	42.6057
20937	161 - Other OR therapeutic procedures on bone	2	76.9324	2	42.6057
20955	161 - Other OR therapeutic procedures on bone	2	76.9324	2	42.6057
20999	164 - Other OR therapeutic procedures on musculoskeletal system	2	82.2172	1	49.1207
21010	162 - Other OR therapeutic procedures on joints	2	68.7867	2	34.5056
21015	160 - Other therapeutic procedures on muscles and tendons	1	73.5418	1	20.4698
21025	142 - Partial excision bone	2	77.1496	2	45.6248
21026	142 - Partial excision bone	2	77.1496	2	45.6248
21029	142 - Partial excision bone	2	77.1496	2	45.6248
21030	142 - Partial excision bone	2	77.1496	2	45.6248
21034	142 - Partial excision bone	2	77.1496	2	45.6248
21040	142 - Partial excision bone	2	77.1496	2	45.6248
21044	142 - Partial excision bone	2	77.1496	2	45.6248
21045	142 - Partial excision bone	2	77.1496	2	45.6248
21046	142 - Partial excision bone	2	77.1496	2	45.6248
21047	142 - Partial excision bone	2	77.1496	2	45.6248
21048	142 - Partial excision bone	2	77.1496	2	45.6248
21049	142 - Partial excision bone	2	77.1496	2	45.6248
21060	164 - Other OR therapeutic procedures on musculoskeletal system	2	82.2172	2	49.8356
21100	33 - Other OR therapeutic procedures on nose, mouth and pharynx	2	74.8338	2	42.8935
21110	29 - Oral and Dental Services	3	81.4145	3	53.5991
21120	161 - Other OR therapeutic procedures on bone	2	76.9324	2	42.6057
21121	161 - Other OR therapeutic procedures on bone	2	76.9324	2	42.6057
21125	161 - Other OR therapeutic procedures on bone	2	76.9324	2	42.6057
21139	161 - Other OR therapeutic procedures on bone	2	76.9324	2	42.6057
21141	161 - Other OR therapeutic procedures on bone	2	76.9324	2	42.6057
21143	161 - Other OR therapeutic procedures on bone	2	76.9324	2	42.6057
21172	161 - Other OR therapeutic procedures on bone	2	76.9324	2	42.6057
21180	161 - Other OR therapeutic procedures on bone	2	76.9324	2	42.6057
21181	161 - Other OR therapeutic procedures on bone	2	76.9324	2	42.6057
21182	161 - Other OR therapeutic procedures on bone	2	76.9324	2	42.6057
21188	161 - Other OR therapeutic procedures on bone	2	76.9324	2	42.6057
21195	161 - Other OR therapeutic procedures on bone	2	76.9324	2	42.6057
21196	161 - Other OR therapeutic procedures on bone	2	76.9324	2	42.6057
21198	161 - Other OR therapeutic procedures on bone	2	76.9324	2	42.6057
21199	161 - Other OR therapeutic procedures on bone	2	76.9324	2	42.6057
21206	161 - Other OR therapeutic procedures on bone	2	76.9324	2	42.6057
21208	161 - Other OR therapeutic procedures on bone	2	76.9324	2	42.6057
21209	142 - Partial excision bone	2	77.1496	2	45.6248
21215	161 - Other OR therapeutic procedures on bone	2	76.9324	2	42.6057
21230	164 - Other OR therapeutic procedures on musculoskeletal system	2	82.2172	2	49.8356
21235	164 - Other OR therapeutic procedures on musculoskeletal system	2	82.2172	2	49.8356
21240	154 - Arthroplasty other than hip or knee	2	0	2	23.8582
21243	154 - Arthroplasty other than hip or knee	2	0	2	23.8582
21244	161 - Other OR therapeutic procedures on bone	2	76.9324	2	42.6057
21245	161 - Other OR therapeutic procedures on bone	2	76.9324	2	42.6057
21247	161 - Other OR therapeutic procedures on bone	2	76.9324	2	42.6057
21275	161 - Other OR therapeutic procedures on bone	2	76.9324	2	42.6057
21282	21 - Other extraocular muscle and orbit therapeutic procedures	3	81.4145	3	53.5991
21299	164 - Other OR therapeutic procedures on musculoskeletal system	2	82.2172	2	49.8356
21343	144 - Treatment, facial fracture or dislocation	2	0	2	22.53
21344	144 - Treatment, facial fracture or dislocation	2	0	2	22.53
21346	144 - Treatment, facial fracture or dislocation	2	0	2	22.53
21347	144 - Treatment, facial fracture or dislocation	2	0	2	22.53
21355	144 - Treatment, facial fracture or dislocation	2	0	2	22.53
21356	144 - Treatment, facial fracture or dislocation	2	0	2	22.53
21360	144 - Treatment, facial fracture or dislocation	2	0	2	22.53
21365	144 - Treatment, facial fracture or dislocation	2	0	1	32.784
21366	144 - Treatment, facial fracture or dislocation	2	0	2	22.53
21385	144 - Treatment, facial fracture or dislocation	2	0	2	22.53
21386	144 - Treatment, facial fracture or dislocation	2	0	2	22.53
21387	144 - Treatment, facial fracture or dislocation	2	0	2	22.53
21390	144 - Treatment, facial fracture or dislocation	2	0	1	0
21406	144 - Treatment, facial fracture or dislocation	2	0	2	22.53
21407	144 - Treatment, facial fracture or dislocation	2	0	2	22.53
21408	144 - Treatment, facial fracture or dislocation	2	0	2	22.53
21422	144 - Treatment, facial fracture or dislocation	2	0	2	22.53
21423	144 - Treatment, facial fracture or dislocation	2	0	2	22.53
21445	144 - Treatment, facial fracture or dislocation	2	0	2	22.53
21453	144 - Treatment, facial fracture or dislocation	2	0	2	22.53
21454	144 - Treatment, facial fracture or dislocation	2	0	2	22.53
21461	144 - Treatment, facial fracture or dislocation	2	0	2	22.53
21462	144 - Treatment, facial fracture or dislocation	2	0	1	0
21465	144 - Treatment, facial fracture or dislocation	2	0	2	22.53
21470	144 - Treatment, facial fracture or dislocation	2	0	2	22.53
21499	164 - Other OR therapeutic procedures on musculoskeletal system	2	82.2172	2	49.8356
21501	168 - Incision and drainage, skin and subcutaneous tissue	1	85.4435	1	55.948
21502	142 - Partial excision bone	2	77.1496	2	45.6248
21510	161 - Other OR therapeutic procedures on bone	2	76.9324	2	42.6057
21555	170 - Excision of skin lesion	1	70.8944	1	22.2724
21556	160 - Other therapeutic procedures on muscles and tendons	1	72.7297	1	23.2152
21557	160 - Other therapeutic procedures on muscles and tendons	1	0	1	25.3885
21600	142 - Partial excision bone	2	77.1496	1	0
21610	142 - Partial excision bone	2	77.1496	2	45.6248
21615	142 - Partial excision bone	1	0	1	27.4184
21616	142 - Partial excision bone	2	77.1496	2	45.6248
21620	142 - Partial excision bone	2	77.1496	2	45.6248
21627	142 - Partial excision bone	2	77.1496	1	75.7452
21630	142 - Partial excision bone	2	77.1496	2	45.6248
21685	164 - Other OR therapeutic procedures on musculoskeletal system	2	82.2172	2	49.8356
21700	160 - Other therapeutic procedures on muscles and tendons	2	78.8362	1	0
21705	142 - Partial excision bone	1	0	1	0
21740	164 - Other OR therapeutic procedures on musculoskeletal system	2	82.2172	2	49.8356
21742	164 - Other OR therapeutic procedures on musculoskeletal system	2	82.2172	2	49.8356
21743	160 - Other therapeutic procedures on muscles and tendons	2	78.8362	2	44.617
21750	161 - Other OR therapeutic procedures on bone	2	76.9324	2	42.6057
21805	148 - Other fracture and dislocation procedure	2	70.6139	2	26.6025
21810	148 - Other fracture and dislocation procedure	2	70.6139	2	26.6025
21825	148 - Other fracture and dislocation procedure	2	70.6139	2	26.6025
21899	164 - Other OR therapeutic procedures on musculoskeletal system	2	82.2172	1	43.8145
21930	160 - Other therapeutic procedures on muscles and tendons	1	0	1	27.5276
21935	160 - Other therapeutic procedures on muscles and tendons	1	69.6675	1	26.1688
22010	168 - Incision and drainage, skin and subcutaneous tissue	2	0	3	53.5991
22015	168 - Incision and drainage, skin and subcutaneous tissue	2	0	1	51.5807
22100	142 - Partial excision bone	2	77.1496	2	45.6248
22101	142 - Partial excision bone	2	77.1496	2	45.6248
22102	142 - Partial excision bone	2	77.1496	2	45.6248
22110	142 - Partial excision bone	2	77.1496	2	45.6248
22207	142 - Partial excision bone	2	77.1496	2	45.6248
22210	142 - Partial excision bone	2	77.1496	2	45.6248
22214	142 - Partial excision bone	2	77.1496	2	45.6248
22220	142 - Partial excision bone	2	77.1496	2	45.6248
22224	142 - Partial excision bone	2	77.1496	1	38.9871
22226	142 - Partial excision bone	2	77.1496	2	45.6248
22318	148 - Other fracture and dislocation procedure	2	70.6139	2	26.6025
22319	148 - Other fracture and dislocation procedure	2	70.6139	2	26.6025
22325	148 - Other fracture and dislocation procedure	2	70.6139	2	26.6025
22326	148 - Other fracture and dislocation procedure	2	70.6139	2	26.6025
22327	148 - Other fracture and dislocation procedure	2	70.6139	2	26.6025
22523	148 - Other fracture and dislocation procedure	2	70.6139	2	26.6025
22524	148 - Other fracture and dislocation procedure	2	70.6139	2	26.6025
22532	158 - Spinal fusion	2	73.8313	2	44.9475
22533	158 - Spinal fusion	2	73.8313	2	44.9475
22534	158 - Spinal fusion	2	73.8313	2	44.9475
22548	158 - Spinal fusion	2	73.8313	2	44.9475
22554	158 - Spinal fusion	1	72.3312	1	34.8068
22556	158 - Spinal fusion	2	73.8313	2	44.9475
22558	158 - Spinal fusion	1	0	1	35.1578
22585	158 - Spinal fusion	2	73.8313	2	44.9475
22590	158 - Spinal fusion	2	73.8313	2	44.9475
22595	158 - Spinal fusion	2	73.8313	2	44.9475
22600	158 - Spinal fusion	1	0	1	39.287
22610	158 - Spinal fusion	2	73.8313	1	57.6624
22612	158 - Spinal fusion	1	67.0349	1	32.3525
22614	158 - Spinal fusion	2	73.8313	2	44.9475
22630	158 - Spinal fusion	1	70.5547	1	34.6826
22632	158 - Spinal fusion	2	73.8313	2	44.9475
22800	158 - Spinal fusion	2	73.8313	2	44.9475
22802	158 - Spinal fusion	2	73.8313	2	44.9475
22804	158 - Spinal fusion	2	73.8313	2	44.9475
22808	158 - Spinal fusion	2	73.8313	2	44.9475
22810	158 - Spinal fusion	2	73.8313	2	44.9475
22830	161 - Other OR therapeutic procedures on bone	2	76.9324	2	42.6057
22840	158 - Spinal fusion	2	73.8313	2	44.9475
22841	158 - Spinal fusion	2	73.8313	2	44.9475
22842	158 - Spinal fusion	2	73.8313	2	44.9475
22843	158 - Spinal fusion	2	73.8313	2	44.9475
22844	158 - Spinal fusion	2	73.8313	2	44.9475
22845	158 - Spinal fusion	2	73.8313	2	44.9475
22846	158 - Spinal fusion	2	73.8313	2	44.9475
22847	158 - Spinal fusion	2	73.8313	2	44.9475
22849	158 - Spinal fusion	2	73.8313	2	44.9475
22850	158 - Spinal fusion	2	73.8313	2	44.9475
22851	158 - Spinal fusion	2	73.8313	1	44.7994
22852	158 - Spinal fusion	2	73.8313	1	36.8755
22855	158 - Spinal fusion	2	73.8313	2	44.9475
22857	158 - Spinal fusion	2	73.8313	2	44.9475
22899	164 - Other OR therapeutic procedures on musculoskeletal system	2	82.2172	2	49.8356
22900	160 - Other therapeutic procedures on muscles and tendons	1	76.5582	1	36.4789
22999	164 - Other OR therapeutic procedures on musculoskeletal system	1	76.6841	1	38.4137
23020	160 - Other therapeutic procedures on muscles and tendons	2	78.8362	2	44.617
23030	160 - Other therapeutic procedures on muscles and tendons	1	81.944	1	45.5079
23031	162 - Other OR therapeutic procedures on joints	2	68.7867	2	34.5056
23035	161 - Other OR therapeutic procedures on bone	2	76.9324	2	42.6057
23040	162 - Other OR therapeutic procedures on joints	2	68.7867	2	34.5056
23044	162 - Other OR therapeutic procedures on joints	2	68.7867	2	34.5056
23075	170 - Excision of skin lesion	2	88.4271	2	43.9092
23076	164 - Other OR therapeutic procedures on musculoskeletal system	1	0	1	0
23077	164 - Other OR therapeutic procedures on musculoskeletal system	1	0	1	28.1412
23101	159 - Other diagnostic procedures on musculoskeletal system	3	81.4145	3	53.5991
23107	159 - Other diagnostic procedures on musculoskeletal system	3	81.4145	3	53.5991
23120	142 - Partial excision bone	2	77.1496	1	0
23130	142 - Partial excision bone	1	75.6082	1	28.8135
23140	142 - Partial excision bone	2	77.1496	2	45.6248
23150	142 - Partial excision bone	2	77.1496	2	45.6248
23156	142 - Partial excision bone	2	77.1496	2	45.6248
23180	142 - Partial excision bone	2	77.1496	2	45.6248
23182	142 - Partial excision bone	2	77.1496	2	45.6248
23184	142 - Partial excision bone	2	77.1496	2	45.6248
23190	142 - Partial excision bone	2	77.1496	2	45.6248
23200	142 - Partial excision bone	2	77.1496	2	45.6248
23210	142 - Partial excision bone	2	77.1496	2	45.6248
23220	142 - Partial excision bone	2	77.1496	2	45.6248
23222	142 - Partial excision bone	2	77.1496	2	45.6248
23332	162 - Other OR therapeutic procedures on joints	2	68.7867	2	34.5056
23395	160 - Other therapeutic procedures on muscles and tendons	2	78.8362	2	44.617
23397	160 - Other therapeutic procedures on muscles and tendons	2	78.8362	2	44.617
23405	160 - Other therapeutic procedures on muscles and tendons	2	78.8362	2	44.617
23406	160 - Other therapeutic procedures on muscles and tendons	2	78.8362	2	44.617
23410	160 - Other therapeutic procedures on muscles and tendons	2	78.8362	1	26.6346
23412	160 - Other therapeutic procedures on muscles and tendons	1	0	1	18.9693
23415	150 - Division of joint capsule, ligament or cartilage	2	71.0984	1	29.4581
23420	154 - Arthroplasty other than hip or knee	1	0	1	28.0615
23430	160 - Other therapeutic procedures on muscles and tendons	2	78.8362	1	0
23440	160 - Other therapeutic procedures on muscles and tendons	2	78.8362	2	44.617
23450	162 - Other OR therapeutic procedures on joints	2	68.7867	2	34.5056
23455	162 - Other OR therapeutic procedures on joints	2	68.7867	1	0
23460	162 - Other OR therapeutic procedures on joints	2	68.7867	2	34.5056
23462	162 - Other OR therapeutic procedures on joints	2	68.7867	2	34.5056
23465	162 - Other OR therapeutic procedures on joints	2	68.7867	2	34.5056
23466	162 - Other OR therapeutic procedures on joints	2	68.7867	2	34.5056
23470	154 - Arthroplasty other than hip or knee	1	74.3647	1	21.4015
23472	154 - Arthroplasty other than hip or knee	1	73.2664	1	20.1649
23480	161 - Other OR therapeutic procedures on bone	2	76.9324	2	42.6057
23485	161 - Other OR therapeutic procedures on bone	2	76.9324	2	42.6057
23491	161 - Other OR therapeutic procedures on bone	2	76.9324	2	42.6057
23515	148 - Other fracture and dislocation procedure	1	0	1	0
23530	148 - Other fracture and dislocation procedure	2	70.6139	2	26.6025
23550	148 - Other fracture and dislocation procedure	2	70.6139	2	26.6025
23552	148 - Other fracture and dislocation procedure	2	70.6139	2	26.6025
23585	148 - Other fracture and dislocation procedure	2	70.6139	2	26.6025
23615	148 - Other fracture and dislocation procedure	2	70.6139	1	39.3891
23616	148 - Other fracture and dislocation procedure	2	70.6139	2	26.6025
23630	148 - Other fracture and dislocation procedure	2	70.6139	2	26.6025
23660	148 - Other fracture and dislocation procedure	2	70.6139	2	26.6025
23670	148 - Other fracture and dislocation procedure	2	70.6139	2	26.6025
23680	148 - Other fracture and dislocation procedure	2	70.6139	2	26.6025
23800	162 - Other OR therapeutic procedures on joints	2	68.7867	2	34.5056
23802	162 - Other OR therapeutic procedures on joints	2	68.7867	2	34.5056
23900	164 - Other OR therapeutic procedures on musculoskeletal system	2	82.2172	2	49.8356
23920	164 - Other OR therapeutic procedures on musculoskeletal system	2	82.2172	2	49.8356
23929	162 - Other OR therapeutic procedures on joints	2	68.7867	2	34.5056
23935	161 - Other OR therapeutic procedures on bone	2	76.9324	2	42.6057
24000	162 - Other OR therapeutic procedures on joints	2	68.7867	2	34.5056
24006	150 - Division of joint capsule, ligament or cartilage	2	71.0984	2	32.784
24075	170 - Excision of skin lesion	1	71.2834	1	18.0689
24076	160 - Other therapeutic procedures on muscles and tendons	1	74.0918	1	21.0891
24077	160 - Other therapeutic procedures on muscles and tendons	1	73.789	1	20.7465
24102	150 - Division of joint capsule, ligament or cartilage	2	71.0984	2	32.784
24105	160 - Other therapeutic procedures on muscles and tendons	2	78.8362	1	0
24116	142 - Partial excision bone	2	77.1496	2	45.6248
24120	142 - Partial excision bone	2	77.1496	2	45.6248
24125	142 - Partial excision bone	2	77.1496	2	45.6248
24130	142 - Partial excision bone	2	77.1496	2	45.6248
24134	161 - Other OR therapeutic procedures on bone	2	76.9324	2	42.6057
24149	142 - Partial excision bone	2	77.1496	2	45.6248
24150	142 - Partial excision bone	2	77.1496	2	45.6248
24152	142 - Partial excision bone	2	77.1496	2	45.6248
24155	162 - Other OR therapeutic procedures on joints	2	68.7867	2	34.5056
24201	160 - Other therapeutic procedures on muscles and tendons	2	78.8362	2	44.617
24301	160 - Other therapeutic procedures on muscles and tendons	2	78.8362	2	44.617
24305	160 - Other therapeutic procedures on muscles and tendons	2	78.8362	2	44.617
24310	160 - Other therapeutic procedures on muscles and tendons	2	78.8362	2	44.617
24332	160 - Other therapeutic procedures on muscles and tendons	2	78.8362	2	44.617
24340	160 - Other therapeutic procedures on muscles and tendons	2	78.8362	2	44.617
24341	160 - Other therapeutic procedures on muscles and tendons	2	78.8362	1	0
24342	160 - Other therapeutic procedures on muscles and tendons	2	78.8362	1	0
24343	162 - Other OR therapeutic procedures on joints	2	68.7867	2	34.5056
24344	162 - Other OR therapeutic procedures on joints	2	68.7867	2	34.5056
24346	162 - Other OR therapeutic procedures on joints	2	68.7867	2	34.5056
24350	162 - Other OR therapeutic procedures on joints	2	68.7867	2	34.5056
24351	162 - Other OR therapeutic procedures on joints	2	68.7867	2	34.5056
24354	160 - Other therapeutic procedures on muscles and tendons	2	78.8362	2	44.617
24356	142 - Partial excision bone	2	77.1496	2	45.6248
24358	162 - Other OR therapeutic procedures on joints	2	68.7867	2	34.5056
24359	162 - Other OR therapeutic procedures on joints	2	68.7867	2	34.5056
24360	154 - Arthroplasty other than hip or knee	2	0	2	23.8582
24361	154 - Arthroplasty other than hip or knee	2	0	2	23.8582
24362	154 - Arthroplasty other than hip or knee	2	0	2	23.8582
24363	154 - Arthroplasty other than hip or knee	2	0	2	23.8582
24365	154 - Arthroplasty other than hip or knee	2	0	2	23.8582
24366	154 - Arthroplasty other than hip or knee	2	0	2	23.8582
24400	161 - Other OR therapeutic procedures on bone	2	76.9324	2	42.6057
24430	148 - Other fracture and dislocation procedure	2	70.6139	2	26.6025
24435	161 - Other OR therapeutic procedures on bone	2	76.9324	2	42.6057
24495	160 - Other therapeutic procedures on muscles and tendons	2	78.8362	2	44.617
24498	148 - Other fracture and dislocation procedure	2	70.6139	2	26.6025
24515	148 - Other fracture and dislocation procedure	2	70.6139	1	32.4938
24516	148 - Other fracture and dislocation procedure	2	70.6139	2	26.6025
24545	148 - Other fracture and dislocation procedure	2	70.6139	2	26.6025
24546	148 - Other fracture and dislocation procedure	2	70.6139	2	26.6025
24575	148 - Other fracture and dislocation procedure	2	70.6139	2	26.6025
24579	148 - Other fracture and dislocation procedure	2	70.6139	2	26.6025
24586	145 - Treatment, fracture or dislocation of radius and ulna	2	67.1203	2	29.5226
24587	145 - Treatment, fracture or dislocation of radius and ulna	2	67.1203	2	29.5226
24615	145 - Treatment, fracture or dislocation of radius and ulna	2	67.1203	2	29.5226
24635	145 - Treatment, fracture or dislocation of radius and ulna	2	67.1203	2	29.5226
24665	145 - Treatment, fracture or dislocation of radius and ulna	2	67.1203	2	29.5226
24666	145 - Treatment, fracture or dislocation of radius and ulna	2	67.1203	2	29.5226
24685	145 - Treatment, fracture or dislocation of radius and ulna	2	67.1203	1	34.7756
24800	162 - Other OR therapeutic procedures on joints	2	68.7867	2	34.5056
24802	162 - Other OR therapeutic procedures on joints	2	68.7867	2	34.5056
24900	164 - Other OR therapeutic procedures on musculoskeletal system	2	82.2172	2	49.8356
24920	164 - Other OR therapeutic procedures on musculoskeletal system	2	82.2172	2	49.8356
24930	164 - Other OR therapeutic procedures on musculoskeletal system	2	82.2172	2	49.8356
24999	164 - Other OR therapeutic procedures on musculoskeletal system	2	82.2172	2	49.8356
25000	160 - Other therapeutic procedures on muscles and tendons	2	78.8362	1	0
25020	160 - Other therapeutic procedures on muscles and tendons	2	78.8362	2	44.617
25023	160 - Other therapeutic procedures on muscles and tendons	2	78.8362	2	44.617
25024	160 - Other therapeutic procedures on muscles and tendons	2	78.8362	2	44.617
25025	160 - Other therapeutic procedures on muscles and tendons	2	78.8362	2	44.617
25035	161 - Other OR therapeutic procedures on bone	2	76.9324	2	42.6057
25040	159 - Other diagnostic procedures on musculoskeletal system	3	81.4145	3	53.5991
25075	170 - Excision of skin lesion	2	88.4271	2	43.9092
25076	160 - Other therapeutic procedures on muscles and tendons	1	0	1	0
25077	160 - Other therapeutic procedures on muscles and tendons	1	0	1	25.4597
25085	150 - Division of joint capsule, ligament or cartilage	2	71.0984	2	32.784
25101	159 - Other diagnostic procedures on musculoskeletal system	3	81.4145	3	53.5991
25105	162 - Other OR therapeutic procedures on joints	2	68.7867	2	34.5056
25110	160 - Other therapeutic procedures on muscles and tendons	2	78.8362	2	44.617
25111	160 - Other therapeutic procedures on muscles and tendons	1	0	1	0
25112	160 - Other therapeutic procedures on muscles and tendons	2	78.8362	2	44.617
25115	160 - Other therapeutic procedures on muscles and tendons	2	78.8362	2	44.617
25116	160 - Other therapeutic procedures on muscles and tendons	2	78.8362	2	44.617
25118	162 - Other OR therapeutic procedures on joints	2	68.7867	2	34.5056
25120	142 - Partial excision bone	2	77.1496	2	45.6248
25125	142 - Partial excision bone	2	77.1496	2	45.6248
25126	142 - Partial excision bone	2	77.1496	2	45.6248
25130	142 - Partial excision bone	2	77.1496	2	45.6248
25135	142 - Partial excision bone	2	77.1496	2	45.6248
25170	142 - Partial excision bone	2	77.1496	2	45.6248
25210	142 - Partial excision bone	2	77.1496	2	45.6248
25215	142 - Partial excision bone	2	77.1496	2	45.6248
25230	142 - Partial excision bone	2	77.1496	2	45.6248
25240	142 - Partial excision bone	2	77.1496	2	45.6248
25248	160 - Other therapeutic procedures on muscles and tendons	2	78.8362	2	44.617
25260	160 - Other therapeutic procedures on muscles and tendons	2	78.8362	2	44.617
25263	160 - Other therapeutic procedures on muscles and tendons	2	78.8362	2	44.617
25270	160 - Other therapeutic procedures on muscles and tendons	2	78.8362	2	44.617
25272	160 - Other therapeutic procedures on muscles and tendons	2	78.8362	2	44.617
25274	160 - Other therapeutic procedures on muscles and tendons	2	78.8362	2	44.617
25275	160 - Other therapeutic procedures on muscles and tendons	2	78.8362	2	44.617
25290	160 - Other therapeutic procedures on muscles and tendons	2	78.8362	2	44.617
25295	160 - Other therapeutic procedures on muscles and tendons	2	78.8362	2	44.617
25300	160 - Other therapeutic procedures on muscles and tendons	2	78.8362	2	44.617
25301	160 - Other therapeutic procedures on muscles and tendons	2	78.8362	2	44.617
25310	160 - Other therapeutic procedures on muscles and tendons	2	78.8362	2	44.617
25312	160 - Other therapeutic procedures on muscles and tendons	2	78.8362	2	44.617
25315	160 - Other therapeutic procedures on muscles and tendons	2	78.8362	2	44.617
25320	162 - Other OR therapeutic procedures on joints	2	68.7867	2	34.5056
25332	154 - Arthroplasty other than hip or knee	2	0	2	23.8582
25337	162 - Other OR therapeutic procedures on joints	2	68.7867	2	34.5056
25350	161 - Other OR therapeutic procedures on bone	2	76.9324	2	42.6057
25360	161 - Other OR therapeutic procedures on bone	2	76.9324	2	42.6057
25365	161 - Other OR therapeutic procedures on bone	2	76.9324	2	42.6057
25390	161 - Other OR therapeutic procedures on bone	2	76.9324	2	42.6057
25400	145 - Treatment, fracture or dislocation of radius and ulna	2	67.1203	2	29.5226
25405	145 - Treatment, fracture or dislocation of radius and ulna	2	67.1203	2	29.5226
25415	145 - Treatment, fracture or dislocation of radius and ulna	2	67.1203	2	29.5226
25420	145 - Treatment, fracture or dislocation of radius and ulna	2	67.1203	2	29.5226
25425	161 - Other OR therapeutic procedures on bone	2	76.9324	2	42.6057
25430	161 - Other OR therapeutic procedures on bone	2	76.9324	2	42.6057
25440	148 - Other fracture and dislocation procedure	2	70.6139	2	26.6025
25441	154 - Arthroplasty other than hip or knee	2	0	2	23.8582
25442	154 - Arthroplasty other than hip or knee	2	0	2	23.8582
25444	154 - Arthroplasty other than hip or knee	2	0	2	23.8582
25445	154 - Arthroplasty other than hip or knee	2	0	2	23.8582
25446	154 - Arthroplasty other than hip or knee	2	0	2	23.8582
25447	154 - Arthroplasty other than hip or knee	2	0	1	26.3821
25449	154 - Arthroplasty other than hip or knee	2	0	2	23.8582
25490	161 - Other OR therapeutic procedures on bone	2	76.9324	2	42.6057
25515	145 - Treatment, fracture or dislocation of radius and ulna	2	67.1203	1	36.8755
25525	145 - Treatment, fracture or dislocation of radius and ulna	2	67.1203	2	29.5226
25526	145 - Treatment, fracture or dislocation of radius and ulna	2	67.1203	2	29.5226
25545	145 - Treatment, fracture or dislocation of radius and ulna	2	67.1203	2	29.5226
25574	145 - Treatment, fracture or dislocation of radius and ulna	2	67.1203	2	29.5226
25575	145 - Treatment, fracture or dislocation of radius and ulna	2	67.1203	2	29.5226
25607	145 - Treatment, fracture or dislocation of radius and ulna	2	67.1203	1	0
25608	145 - Treatment, fracture or dislocation of radius and ulna	2	67.1203	1	0
25609	145 - Treatment, fracture or dislocation of radius and ulna	2	67.1203	1	35.3553
25611	145 - Treatment, fracture or dislocation of radius and ulna	2	67.1203	2	29.5226
25620	145 - Treatment, fracture or dislocation of radius and ulna	2	67.1203	1	0
25628	148 - Other fracture and dislocation procedure	2	70.6139	1	0
25645	148 - Other fracture and dislocation procedure	2	70.6139	2	26.6025
25652	145 - Treatment, fracture or dislocation of radius and ulna	2	67.1203	2	29.5226
25670	148 - Other fracture and dislocation procedure	2	70.6139	2	26.6025
25676	145 - Treatment, fracture or dislocation of radius and ulna	2	67.1203	2	29.5226
25685	148 - Other fracture and dislocation procedure	2	70.6139	2	26.6025
25695	148 - Other fracture and dislocation procedure	2	70.6139	2	26.6025
25900	164 - Other OR therapeutic procedures on musculoskeletal system	2	82.2172	2	49.8356
25905	164 - Other OR therapeutic procedures on musculoskeletal system	2	82.2172	2	49.8356
25907	164 - Other OR therapeutic procedures on musculoskeletal system	2	82.2172	2	49.8356
25920	164 - Other OR therapeutic procedures on musculoskeletal system	2	82.2172	2	49.8356
25927	164 - Other OR therapeutic procedures on musculoskeletal system	2	82.2172	1	37.3607
25929	164 - Other OR therapeutic procedures on musculoskeletal system	2	82.2172	2	49.8356
25931	164 - Other OR therapeutic procedures on musculoskeletal system	2	82.2172	2	49.8356
25999	164 - Other OR therapeutic procedures on musculoskeletal system	2	82.2172	2	49.8356
26117	160 - Other therapeutic procedures on muscles and tendons	2	78.8362	2	44.617
26121	160 - Other therapeutic procedures on muscles and tendons	2	78.8362	2	44.617
26123	160 - Other therapeutic procedures on muscles and tendons	2	78.8362	1	0
26125	160 - Other therapeutic procedures on muscles and tendons	2	78.8362	2	44.617
26130	162 - Other OR therapeutic procedures on joints	2	68.7867	2	34.5056
26135	162 - Other OR therapeutic procedures on joints	2	68.7867	2	34.5056
26145	162 - Other OR therapeutic procedures on joints	2	68.7867	2	34.5056
26160	160 - Other therapeutic procedures on muscles and tendons	2	78.8362	2	44.617
26170	160 - Other therapeutic procedures on muscles and tendons	2	78.8362	2	44.617
26180	160 - Other therapeutic procedures on muscles and tendons	2	78.8362	2	44.617
26205	142 - Partial excision bone	2	77.1496	2	45.6248
26215	142 - Partial excision bone	2	77.1496	2	45.6248
26230	142 - Partial excision bone	2	77.1496	2	45.6248
26235	142 - Partial excision bone	2	77.1496	2	45.6248
26236	142 - Partial excision bone	2	77.1496	2	45.6248
26260	142 - Partial excision bone	2	77.1496	2	45.6248
26350	160 - Other therapeutic procedures on muscles and tendons	2	78.8362	1	0
26352	160 - Other therapeutic procedures on muscles and tendons	2	78.8362	2	44.617
26356	160 - Other therapeutic procedures on muscles and tendons	2	78.8362	1	0
26357	160 - Other therapeutic procedures on muscles and tendons	2	78.8362	2	44.617
26358	160 - Other therapeutic procedures on muscles and tendons	2	78.8362	2	44.617
26370	160 - Other therapeutic procedures on muscles and tendons	2	78.8362	2	44.617
26372	160 - Other therapeutic procedures on muscles and tendons	2	78.8362	2	44.617
26373	160 - Other therapeutic procedures on muscles and tendons	2	78.8362	2	44.617
26390	160 - Other therapeutic procedures on muscles and tendons	2	78.8362	2	44.617
26392	160 - Other therapeutic procedures on muscles and tendons	2	78.8362	2	44.617
26410	160 - Other therapeutic procedures on muscles and tendons	2	78.8362	2	44.617
26412	160 - Other therapeutic procedures on muscles and tendons	2	78.8362	2	44.617
26415	160 - Other therapeutic procedures on muscles and tendons	2	78.8362	2	44.617
26418	160 - Other therapeutic procedures on muscles and tendons	2	78.8362	1	0
26420	160 - Other therapeutic procedures on muscles and tendons	2	78.8362	2	44.617
26426	160 - Other therapeutic procedures on muscles and tendons	2	78.8362	2	44.617
26428	160 - Other therapeutic procedures on muscles and tendons	2	78.8362	2	44.617
26433	160 - Other therapeutic procedures on muscles and tendons	2	78.8362	2	44.617
26437	160 - Other therapeutic procedures on muscles and tendons	2	78.8362	2	44.617
26440	160 - Other therapeutic procedures on muscles and tendons	2	78.8362	2	44.617
26442	160 - Other therapeutic procedures on muscles and tendons	2	78.8362	2	44.617
26445	160 - Other therapeutic procedures on muscles and tendons	2	78.8362	2	44.617
26449	160 - Other therapeutic procedures on muscles and tendons	2	78.8362	2	44.617
26455	160 - Other therapeutic procedures on muscles and tendons	2	78.8362	2	44.617
26460	160 - Other therapeutic procedures on muscles and tendons	2	78.8362	2	44.617
26471	160 - Other therapeutic procedures on muscles and tendons	2	78.8362	2	44.617
26474	160 - Other therapeutic procedures on muscles and tendons	2	78.8362	2	44.617
26477	160 - Other therapeutic procedures on muscles and tendons	2	78.8362	2	44.617
26478	160 - Other therapeutic procedures on muscles and tendons	2	78.8362	2	44.617
26480	160 - Other therapeutic procedures on muscles and tendons	2	78.8362	2	44.617
26483	160 - Other therapeutic procedures on muscles and tendons	2	78.8362	2	44.617
26485	160 - Other therapeutic procedures on muscles and tendons	2	78.8362	2	44.617
26489	160 - Other therapeutic procedures on muscles and tendons	2	78.8362	2	44.617
26490	160 - Other therapeutic procedures on muscles and tendons	2	78.8362	2	44.617
26492	160 - Other therapeutic procedures on muscles and tendons	2	78.8362	2	44.617
26494	160 - Other therapeutic procedures on muscles and tendons	2	78.8362	2	44.617
26496	160 - Other therapeutic procedures on muscles and tendons	2	78.8362	2	44.617
26497	160 - Other therapeutic procedures on muscles and tendons	2	78.8362	2	44.617
26498	160 - Other therapeutic procedures on muscles and tendons	2	78.8362	2	44.617
26500	160 - Other therapeutic procedures on muscles and tendons	2	78.8362	2	44.617
26502	160 - Other therapeutic procedures on muscles and tendons	2	78.8362	2	44.617
26510	160 - Other therapeutic procedures on muscles and tendons	2	78.8362	2	44.617
26520	150 - Division of joint capsule, ligament or cartilage	2	71.0984	2	32.784
26525	150 - Division of joint capsule, ligament or cartilage	2	71.0984	2	32.784
26530	154 - Arthroplasty other than hip or knee	2	0	2	23.8582
26531	154 - Arthroplasty other than hip or knee	2	0	2	23.8582
26535	154 - Arthroplasty other than hip or knee	2	0	2	23.8582
26536	154 - Arthroplasty other than hip or knee	2	0	2	23.8582
26540	162 - Other OR therapeutic procedures on joints	2	68.7867	2	34.5056
26541	162 - Other OR therapeutic procedures on joints	2	68.7867	2	34.5056
26542	162 - Other OR therapeutic procedures on joints	2	68.7867	2	34.5056
26545	162 - Other OR therapeutic procedures on joints	2	68.7867	2	34.5056
26546	161 - Other OR therapeutic procedures on bone	2	76.9324	2	42.6057
26548	162 - Other OR therapeutic procedures on joints	2	68.7867	2	34.5056
26555	161 - Other OR therapeutic procedures on bone	2	76.9324	2	42.6057
26561	175 - Other OR therapeutic procedures on skin and breast	2	65.8428	2	35.08
26565	161 - Other OR therapeutic procedures on bone	2	76.9324	2	42.6057
26567	161 - Other OR therapeutic procedures on bone	2	76.9324	2	42.6057
26568	161 - Other OR therapeutic procedures on bone	2	76.9324	2	42.6057
26587	164 - Other OR therapeutic procedures on musculoskeletal system	2	82.2172	2	49.8356
26590	164 - Other OR therapeutic procedures on musculoskeletal system	2	82.2172	2	49.8356
26593	160 - Other therapeutic procedures on muscles and tendons	2	78.8362	2	44.617
26608	148 - Other fracture and dislocation procedure	2	70.6139	2	26.6025
26615	148 - Other fracture and dislocation procedure	1	0	1	0
26650	148 - Other fracture and dislocation procedure	2	70.6139	2	26.6025
26665	148 - Other fracture and dislocation procedure	2	70.6139	2	26.6025
26676	148 - Other fracture and dislocation procedure	2	70.6139	2	26.6025
26685	148 - Other fracture and dislocation procedure	2	70.6139	2	26.6025
26686	148 - Other fracture and dislocation procedure	2	70.6139	2	26.6025
26727	148 - Other fracture and dislocation procedure	2	70.6139	1	0
26735	148 - Other fracture and dislocation procedure	2	70.6139	1	0
26746	148 - Other fracture and dislocation procedure	2	70.6139	2	26.6025
26756	148 - Other fracture and dislocation procedure	2	70.6139	2	26.6025
26765	148 - Other fracture and dislocation procedure	2	70.6139	2	26.6025
26776	148 - Other fracture and dislocation procedure	2	70.6139	2	26.6025
26785	148 - Other fracture and dislocation procedure	2	70.6139	2	26.6025
26910	164 - Other OR therapeutic procedures on musculoskeletal system	2	82.2172	2	49.8356
26951	164 - Other OR therapeutic procedures on musculoskeletal system	2	82.2172	2	49.8356
26952	164 - Other OR therapeutic procedures on musculoskeletal system	2	82.2172	1	33.7211
26989	164 - Other OR therapeutic procedures on musculoskeletal system	2	82.2172	2	49.8356
26990	162 - Other OR therapeutic procedures on joints	1	81.0627	1	58.3817
26991	162 - Other OR therapeutic procedures on joints	2	68.7867	2	34.5056
26992	161 - Other OR therapeutic procedures on bone	2	76.9324	2	42.6057
27001	160 - Other therapeutic procedures on muscles and tendons	2	78.8362	2	44.617
27005	160 - Other therapeutic procedures on muscles and tendons	2	78.8362	2	44.617
27025	160 - Other therapeutic procedures on muscles and tendons	2	78.8362	2	44.617
27030	162 - Other OR therapeutic procedures on joints	2	68.7867	2	34.5056
27033	162 - Other OR therapeutic procedures on joints	2	68.7867	2	34.5056
27035	9 - Other OR therapeutic nervous system procedures	2	78.7796	2	42.8715
27036	150 - Division of joint capsule, ligament or cartilage	2	71.0984	2	32.784
27047	170 - Excision of skin lesion	1	0	1	22.2724
27048	160 - Other therapeutic procedures on muscles and tendons	1	0	1	23.6948
27049	160 - Other therapeutic procedures on muscles and tendons	1	0	1	48.8751
27054	162 - Other OR therapeutic procedures on joints	2	68.7867	2	34.5056
27060	160 - Other therapeutic procedures on muscles and tendons	2	78.8362	2	44.617
27062	160 - Other therapeutic procedures on muscles and tendons	2	78.8362	2	44.617
27066	142 - Partial excision bone	2	77.1496	2	45.6248
27070	142 - Partial excision bone	2	77.1496	2	45.6248
27071	142 - Partial excision bone	2	77.1496	2	45.6248
27075	142 - Partial excision bone	2	77.1496	2	45.6248
27077	142 - Partial excision bone	2	77.1496	2	45.6248
27080	161 - Other OR therapeutic procedures on bone	2	76.9324	2	42.6057
27086	175 - Other OR therapeutic procedures on skin and breast	2	65.8428	2	35.08
27087	160 - Other therapeutic procedures on muscles and tendons	2	78.8362	2	44.617
27100	160 - Other therapeutic procedures on muscles and tendons	2	78.8362	2	44.617
27120	162 - Other OR therapeutic procedures on joints	2	68.7867	2	34.5056
27122	142 - Partial excision bone	2	77.1496	2	45.6248
27125	153 - Hip replacement, total and partial	1	87.7171	1	55.5973
27130	153 - Hip replacement, total and partial	1	73.1977	1	33.6511
27132	153 - Hip replacement, total and partial	2	83.3678	1	47.3896
27134	153 - Hip replacement, total and partial	1	79.5763	1	50.0289
27137	153 - Hip replacement, total and partial	2	83.3678	1	35.1578
27138	153 - Hip replacement, total and partial	2	83.3678	1	67.0072
27140	161 - Other OR therapeutic procedures on bone	2	76.9324	2	42.6057
27146	162 - Other OR therapeutic procedures on joints	2	68.7867	2	34.5056
27147	162 - Other OR therapeutic procedures on joints	2	68.7867	2	34.5056
27156	162 - Other OR therapeutic procedures on joints	2	68.7867	2	34.5056
27161	161 - Other OR therapeutic procedures on bone	2	76.9324	2	42.6057
27165	161 - Other OR therapeutic procedures on bone	2	76.9324	2	42.6057
27170	161 - Other OR therapeutic procedures on bone	2	76.9324	2	42.6057
27178	146 - Treatment, fracture or dislocation of hip and femur	2	79.1163	2	51.5113
27179	146 - Treatment, fracture or dislocation of hip and femur	2	79.1163	2	51.5113
27181	146 - Treatment, fracture or dislocation of hip and femur	2	79.1163	2	51.5113
27187	146 - Treatment, fracture or dislocation of hip and femur	2	79.1163	2	51.5113
27215	148 - Other fracture and dislocation procedure	2	70.6139	2	26.6025
27217	148 - Other fracture and dislocation procedure	2	70.6139	2	26.6025
27226	148 - Other fracture and dislocation procedure	2	70.6139	2	26.6025
27227	148 - Other fracture and dislocation procedure	2	70.6139	2	26.6025
27228	148 - Other fracture and dislocation procedure	2	70.6139	2	26.6025
27235	146 - Treatment, fracture or dislocation of hip and femur	1	83.3678	1	47.3604
27236	146 - Treatment, fracture or dislocation of hip and femur	1	83.8485	1	54.9092
27244	146 - Treatment, fracture or dislocation of hip and femur	1	82.5479	1	48.1314
27245	146 - Treatment, fracture or dislocation of hip and femur	1	86.7301	1	57.6318
27248	146 - Treatment, fracture or dislocation of hip and femur	2	79.1163	1	37.3607
27253	146 - Treatment, fracture or dislocation of hip and femur	2	79.1163	2	51.5113
27254	146 - Treatment, fracture or dislocation of hip and femur	2	79.1163	2	51.5113
27256	146 - Treatment, fracture or dislocation of hip and femur	2	79.1163	2	51.5113
27258	146 - Treatment, fracture or dislocation of hip and femur	2	79.1163	2	51.5113
27259	146 - Treatment, fracture or dislocation of hip and femur	2	79.1163	2	51.5113
27269	146 - Treatment, fracture or dislocation of hip and femur	2	79.1163	2	51.5113
27280	162 - Other OR therapeutic procedures on joints	2	68.7867	2	34.5056
27284	162 - Other OR therapeutic procedures on joints	2	68.7867	2	34.5056
27290	157 - Amputation of lower extremity	2	89.0331	3	53.5991
27295	157 - Amputation of lower extremity	2	89.0331	1	82.0103
27299	162 - Other OR therapeutic procedures on joints	2	68.7867	1	41.1208
27301	160 - Other therapeutic procedures on muscles and tendons	1	83.0499	1	50.142
27303	161 - Other OR therapeutic procedures on bone	2	76.9324	2	42.6057
27305	160 - Other therapeutic procedures on muscles and tendons	2	78.8362	2	44.617
27307	160 - Other therapeutic procedures on muscles and tendons	2	78.8362	2	44.617
27310	162 - Other OR therapeutic procedures on joints	2	68.7867	1	60.5424
27327	170 - Excision of skin lesion	1	70.7219	1	29.9353
27328	160 - Other therapeutic procedures on muscles and tendons	1	70.97	1	25.6045
27329	160 - Other therapeutic procedures on muscles and tendons	1	75.5222	1	38.9282
27331	160 - Other therapeutic procedures on muscles and tendons	2	78.8362	2	44.617
27332	151 - Excision of semilunar cartilage of knee	3	81.4145	2	0
27333	151 - Excision of semilunar cartilage of knee	3	81.4145	2	0
27334	162 - Other OR therapeutic procedures on joints	2	68.7867	2	34.5056
27335	162 - Other OR therapeutic procedures on joints	2	68.7867	2	34.5056
27340	160 - Other therapeutic procedures on muscles and tendons	2	78.8362	1	37.3607
27345	160 - Other therapeutic procedures on muscles and tendons	2	78.8362	2	44.617
27347	151 - Excision of semilunar cartilage of knee	3	81.4145	2	0
27350	142 - Partial excision bone	2	77.1496	2	45.6248
27355	142 - Partial excision bone	2	77.1496	2	45.6248
27356	142 - Partial excision bone	2	77.1496	2	45.6248
27360	142 - Partial excision bone	2	77.1496	2	45.6248
27365	142 - Partial excision bone	2	77.1496	2	45.6248
27372	160 - Other therapeutic procedures on muscles and tendons	2	78.8362	2	44.617
27380	160 - Other therapeutic procedures on muscles and tendons	2	78.8362	1	0
27381	160 - Other therapeutic procedures on muscles and tendons	2	78.8362	2	44.617
27385	160 - Other therapeutic procedures on muscles and tendons	2	78.8362	1	0
27386	160 - Other therapeutic procedures on muscles and tendons	2	78.8362	2	44.617
27390	160 - Other therapeutic procedures on muscles and tendons	2	78.8362	2	44.617
27391	160 - Other therapeutic procedures on muscles and tendons	2	78.8362	2	44.617
27395	160 - Other therapeutic procedures on muscles and tendons	2	78.8362	2	44.617
27403	151 - Excision of semilunar cartilage of knee	3	81.4145	2	0
27405	151 - Excision of semilunar cartilage of knee	3	81.4145	2	0
27407	151 - Excision of semilunar cartilage of knee	3	81.4145	2	0
27409	151 - Excision of semilunar cartilage of knee	3	81.4145	2	0
27412	162 - Other OR therapeutic procedures on joints	2	68.7867	2	34.5056
27415	162 - Other OR therapeutic procedures on joints	2	68.7867	2	34.5056
27416	162 - Other OR therapeutic procedures on joints	2	68.7867	2	34.5056
27418	142 - Partial excision bone	2	77.1496	2	45.6248
27420	152 - Arthroplasty knee	2	72.4794	2	30.2712
27422	152 - Arthroplasty knee	2	72.4794	2	30.2712
27425	150 - Division of joint capsule, ligament or cartilage	2	71.0984	2	32.784
27427	152 - Arthroplasty knee	2	72.4794	2	30.2712
27428	152 - Arthroplasty knee	2	72.4794	2	30.2712
27429	152 - Arthroplasty knee	2	72.4794	2	30.2712
27430	160 - Other therapeutic procedures on muscles and tendons	2	78.8362	2	44.617
27435	150 - Division of joint capsule, ligament or cartilage	2	71.0984	2	32.784
27437	152 - Arthroplasty knee	2	72.4794	2	30.2712
27438	152 - Arthroplasty knee	2	72.4794	1	31.943
27440	152 - Arthroplasty knee	2	72.4794	2	30.2712
27441	152 - Arthroplasty knee	2	72.4794	2	30.2712
27442	152 - Arthroplasty knee	2	72.4794	2	30.2712
27443	152 - Arthroplasty knee	2	72.4794	2	30.2712
27445	152 - Arthroplasty knee	2	72.4794	2	30.2712
27446	152 - Arthroplasty knee	1	0	1	26.3409
27447	152 - Arthroplasty knee	1	64.8077	1	32.9409
27448	161 - Other OR therapeutic procedures on bone	2	76.9324	2	42.6057
27450	161 - Other OR therapeutic procedures on bone	2	76.9324	2	42.6057
27457	161 - Other OR therapeutic procedures on bone	2	76.9324	2	42.6057
27466	161 - Other OR therapeutic procedures on bone	2	76.9324	2	42.6057
27468	161 - Other OR therapeutic procedures on bone	2	76.9324	2	42.6057
27470	164 - Other OR therapeutic procedures on musculoskeletal system	2	82.2172	2	49.8356
27472	146 - Treatment, fracture or dislocation of hip and femur	2	79.1163	2	51.5113
27477	161 - Other OR therapeutic procedures on bone	2	76.9324	2	42.6057
27486	152 - Arthroplasty knee	1	0	1	33.6117
27487	152 - Arthroplasty knee	1	0	1	39.0464
27488	162 - Other OR therapeutic procedures on joints	2	68.7867	1	29.6532
27495	146 - Treatment, fracture or dislocation of hip and femur	2	79.1163	2	51.5113
27496	160 - Other therapeutic procedures on muscles and tendons	2	78.8362	2	44.617
27497	160 - Other therapeutic procedures on muscles and tendons	2	78.8362	2	44.617
27498	160 - Other therapeutic procedures on muscles and tendons	2	78.8362	2	44.617
27499	160 - Other therapeutic procedures on muscles and tendons	2	78.8362	2	44.617
27506	146 - Treatment, fracture or dislocation of hip and femur	2	79.1163	1	37.8726
27507	146 - Treatment, fracture or dislocation of hip and femur	2	79.1163	1	34.4095
27509	146 - Treatment, fracture or dislocation of hip and femur	2	79.1163	2	51.5113
27511	146 - Treatment, fracture or dislocation of hip and femur	2	79.1163	2	51.5113
27513	146 - Treatment, fracture or dislocation of hip and femur	2	79.1163	2	51.5113
27514	146 - Treatment, fracture or dislocation of hip and femur	2	79.1163	2	51.5113
27524	147 - Treatment, fracture or dislocation of lower extremity (other than hip or femur)	2	0	1	32.4938
27535	147 - Treatment, fracture or dislocation of lower extremity (other than hip or femur)	2	0	1	27.4546
27536	147 - Treatment, fracture or dislocation of lower extremity (other than hip or femur)	2	0	1	0
27540	147 - Treatment, fracture or dislocation of lower extremity (other than hip or femur)	2	0	2	0
27556	147 - Treatment, fracture or dislocation of lower extremity (other than hip or femur)	2	0	2	0
27558	147 - Treatment, fracture or dislocation of lower extremity (other than hip or femur)	2	0	2	0
27566	147 - Treatment, fracture or dislocation of lower extremity (other than hip or femur)	2	0	2	0
27580	162 - Other OR therapeutic procedures on joints	2	68.7867	2	34.5056
27590	157 - Amputation of lower extremity	1	93.9829	1	70.0286
27591	157 - Amputation of lower extremity	2	89.0331	3	53.5991
27592	157 - Amputation of lower extremity	1	98.4805	1	80.178
27594	157 - Amputation of lower extremity	2	89.0331	1	62.5263
27596	157 - Amputation of lower extremity	1	94.038	1	68.4235
27598	157 - Amputation of lower extremity	1	93.8961	1	73.5254
27599	164 - Other OR therapeutic procedures on musculoskeletal system	2	82.2172	2	49.8356
27600	160 - Other therapeutic procedures on muscles and tendons	2	78.8362	1	69.7491
27601	160 - Other therapeutic procedures on muscles and tendons	2	78.8362	2	44.617
27602	160 - Other therapeutic procedures on muscles and tendons	1	91.3605	1	76.1147
27603	160 - Other therapeutic procedures on muscles and tendons	1	81.0034	1	49.1207
27604	160 - Other therapeutic procedures on muscles and tendons	2	78.8362	2	44.617
27606	160 - Other therapeutic procedures on muscles and tendons	2	78.8362	2	44.617
27607	161 - Other OR therapeutic procedures on bone	2	76.9324	2	42.6057
27610	162 - Other OR therapeutic procedures on joints	2	68.7867	2	34.5056
27612	150 - Division of joint capsule, ligament or cartilage	2	71.0984	2	32.784
27615	160 - Other therapeutic procedures on muscles and tendons	1	0	1	33.0085
27618	170 - Excision of skin lesion	1	76.6151	1	24.1121
27619	160 - Other therapeutic procedures on muscles and tendons	1	0	1	0
27620	159 - Other diagnostic procedures on musculoskeletal system	3	81.4145	3	53.5991
27625	162 - Other OR therapeutic procedures on joints	2	68.7867	2	34.5056
27626	160 - Other therapeutic procedures on muscles and tendons	2	78.8362	2	44.617
27630	160 - Other therapeutic procedures on muscles and tendons	2	78.8362	2	44.617
27635	142 - Partial excision bone	2	77.1496	2	45.6248
27637	142 - Partial excision bone	2	77.1496	2	45.6248
27638	142 - Partial excision bone	2	77.1496	2	45.6248
27640	142 - Partial excision bone	2	77.1496	2	45.6248
27641	142 - Partial excision bone	2	77.1496	2	45.6248
27645	142 - Partial excision bone	2	77.1496	2	45.6248
27646	142 - Partial excision bone	2	77.1496	2	45.6248
27647	142 - Partial excision bone	2	77.1496	2	45.6248
27650	160 - Other therapeutic procedures on muscles and tendons	1	0	1	0
27652	160 - Other therapeutic procedures on muscles and tendons	2	78.8362	2	44.617
27654	160 - Other therapeutic procedures on muscles and tendons	2	78.8362	2	44.617
27656	160 - Other therapeutic procedures on muscles and tendons	2	78.8362	2	44.617
27658	160 - Other therapeutic procedures on muscles and tendons	2	78.8362	2	44.617
27664	160 - Other therapeutic procedures on muscles and tendons	2	78.8362	2	44.617
27665	160 - Other therapeutic procedures on muscles and tendons	2	78.8362	2	44.617
27675	160 - Other therapeutic procedures on muscles and tendons	2	78.8362	2	44.617
27676	160 - Other therapeutic procedures on muscles and tendons	2	78.8362	2	44.617
27680	160 - Other therapeutic procedures on muscles and tendons	2	78.8362	2	44.617
27681	160 - Other therapeutic procedures on muscles and tendons	2	78.8362	2	44.617
27685	160 - Other therapeutic procedures on muscles and tendons	2	78.8362	2	44.617
27686	160 - Other therapeutic procedures on muscles and tendons	2	78.8362	2	44.617
27687	160 - Other therapeutic procedures on muscles and tendons	2	78.8362	2	44.617
27692	160 - Other therapeutic procedures on muscles and tendons	2	78.8362	2	44.617
27695	162 - Other OR therapeutic procedures on joints	2	68.7867	2	34.5056
27696	162 - Other OR therapeutic procedures on joints	2	68.7867	2	34.5056
27698	162 - Other OR therapeutic procedures on joints	2	68.7867	1	0
27700	154 - Arthroplasty other than hip or knee	2	0	2	23.8582
27702	154 - Arthroplasty other than hip or knee	2	0	2	23.8582
27705	161 - Other OR therapeutic procedures on bone	2	76.9324	2	42.6057
27707	161 - Other OR therapeutic procedures on bone	2	76.9324	2	42.6057
27709	161 - Other OR therapeutic procedures on bone	2	76.9324	2	42.6057
27715	161 - Other OR therapeutic procedures on bone	2	76.9324	2	42.6057
27720	147 - Treatment, fracture or dislocation of lower extremity (other than hip or femur)	2	0	2	0
27722	147 - Treatment, fracture or dislocation of lower extremity (other than hip or femur)	2	0	2	0
27724	147 - Treatment, fracture or dislocation of lower extremity (other than hip or femur)	2	0	1	0
27725	147 - Treatment, fracture or dislocation of lower extremity (other than hip or femur)	2	0	2	0
27726	147 - Treatment, fracture or dislocation of lower extremity (other than hip or femur)	2	0	2	0
27745	161 - Other OR therapeutic procedures on bone	2	76.9324	2	42.6057
27756	147 - Treatment, fracture or dislocation of lower extremity (other than hip or femur)	2	0	2	0
27758	147 - Treatment, fracture or dislocation of lower extremity (other than hip or femur)	2	0	1	39.5964
27759	147 - Treatment, fracture or dislocation of lower extremity (other than hip or femur)	2	0	1	26.6346
27766	147 - Treatment, fracture or dislocation of lower extremity (other than hip or femur)	2	0	1	0
27769	147 - Treatment, fracture or dislocation of lower extremity (other than hip or femur)	2	0	2	0
27784	147 - Treatment, fracture or dislocation of lower extremity (other than hip or femur)	2	0	2	0
27792	147 - Treatment, fracture or dislocation of lower extremity (other than hip or femur)	1	0	1	28.0615
27814	147 - Treatment, fracture or dislocation of lower extremity (other than hip or femur)	1	71.8491	1	31.8899
27822	147 - Treatment, fracture or dislocation of lower extremity (other than hip or femur)	1	0	1	0
27823	147 - Treatment, fracture or dislocation of lower extremity (other than hip or femur)	2	0	2	0
27826	147 - Treatment, fracture or dislocation of lower extremity (other than hip or femur)	2	0	2	0
27827	147 - Treatment, fracture or dislocation of lower extremity (other than hip or femur)	2	0	1	0
27828	147 - Treatment, fracture or dislocation of lower extremity (other than hip or femur)	2	0	1	42.0774
27829	147 - Treatment, fracture or dislocation of lower extremity (other than hip or femur)	2	0	1	0
27832	147 - Treatment, fracture or dislocation of lower extremity (other than hip or femur)	2	0	2	0
27846	147 - Treatment, fracture or dislocation of lower extremity (other than hip or femur)	2	0	2	0
27848	147 - Treatment, fracture or dislocation of lower extremity (other than hip or femur)	2	0	2	0
27880	157 - Amputation of lower extremity	1	89.6572	1	62.8808
27881	157 - Amputation of lower extremity	2	89.0331	1	57.6111
27882	157 - Amputation of lower extremity	1	88.2564	1	64.8709
27884	157 - Amputation of lower extremity	1	74.0475	1	51.8859
27886	157 - Amputation of lower extremity	1	85.4223	1	53.1367
27888	157 - Amputation of lower extremity	2	89.0331	1	65.8231
27889	157 - Amputation of lower extremity	2	89.0331	1	58.9513
27892	160 - Other therapeutic procedures on muscles and tendons	2	78.8362	2	44.617
27893	160 - Other therapeutic procedures on muscles and tendons	2	78.8362	2	44.617
27894	160 - Other therapeutic procedures on muscles and tendons	2	78.8362	2	44.617
27899	164 - Other OR therapeutic procedures on musculoskeletal system	2	82.2172	1	45.3265
28002	160 - Other therapeutic procedures on muscles and tendons	2	78.8362	1	49.1207
28003	160 - Other therapeutic procedures on muscles and tendons	2	78.8362	1	36.4145
28420	147 - Treatment, fracture or dislocation of lower extremity (other than hip or femur)	2	0	2	0
28445	147 - Treatment, fracture or dislocation of lower extremity (other than hip or femur)	2	0	2	0
28800	157 - Amputation of lower extremity	1	88.5355	1	62.0137
28805	157 - Amputation of lower extremity	1	82.1768	1	56.5218
29806	162 - Other OR therapeutic procedures on joints	1	0	1	0
29807	162 - Other OR therapeutic procedures on joints	1	0	1	0
29819	149 - Arthroscopy	3	81.4145	2	0
29820	162 - Other OR therapeutic procedures on joints	2	68.7867	2	34.5056
29821	162 - Other OR therapeutic procedures on joints	2	68.7867	2	34.5056
29822	162 - Other OR therapeutic procedures on joints	2	68.7867	1	0
29823	162 - Other OR therapeutic procedures on joints	1	0	1	0
29824	142 - Partial excision bone	1	0	1	0
29825	150 - Division of joint capsule, ligament or cartilage	2	71.0984	1	35.1578
29826	154 - Arthroplasty other than hip or knee	1	0	1	17.7617
29827	160 - Other therapeutic procedures on muscles and tendons	1	0	1	14.3305
29828	160 - Other therapeutic procedures on muscles and tendons	2	78.8362	2	44.617
29834	149 - Arthroscopy	3	81.4145	2	0
29835	162 - Other OR therapeutic procedures on joints	2	68.7867	2	34.5056
29837	162 - Other OR therapeutic procedures on joints	2	68.7867	2	34.5056
29838	162 - Other OR therapeutic procedures on joints	2	68.7867	2	34.5056
29844	162 - Other OR therapeutic procedures on joints	2	68.7867	2	34.5056
29846	162 - Other OR therapeutic procedures on joints	2	68.7867	1	0
29847	145 - Treatment, fracture or dislocation of radius and ulna	2	67.1203	2	29.5226
29851	147 - Treatment, fracture or dislocation of lower extremity (other than hip or femur)	2	0	2	0
29855	147 - Treatment, fracture or dislocation of lower extremity (other than hip or femur)	2	0	2	0
29862	162 - Other OR therapeutic procedures on joints	2	68.7867	1	26.897
29866	162 - Other OR therapeutic procedures on joints	2	68.7867	2	34.5056
29867	162 - Other OR therapeutic procedures on joints	2	68.7867	2	34.5056
29868	162 - Other OR therapeutic procedures on joints	2	68.7867	2	34.5056
29871	149 - Arthroscopy	3	81.4145	1	50.7063
29873	150 - Division of joint capsule, ligament or cartilage	2	71.0984	1	26.1389
29874	162 - Other OR therapeutic procedures on joints	2	68.7867	1	0
29875	162 - Other OR therapeutic procedures on joints	1	0	1	19.3124
29876	162 - Other OR therapeutic procedures on joints	1	0	1	0
29877	162 - Other OR therapeutic procedures on joints	1	0	1	21.3482
29879	162 - Other OR therapeutic procedures on joints	1	0	1	20.6993
29880	151 - Excision of semilunar cartilage of knee	1	0	1	0
29881	151 - Excision of semilunar cartilage of knee	1	0	1	17.3215
29882	151 - Excision of semilunar cartilage of knee	1	0	1	0
29883	151 - Excision of semilunar cartilage of knee	3	81.4145	2	0
29884	150 - Division of joint capsule, ligament or cartilage	2	71.0984	2	32.784
29885	162 - Other OR therapeutic procedures on joints	2	68.7867	2	34.5056
29886	162 - Other OR therapeutic procedures on joints	2	68.7867	2	34.5056
29887	162 - Other OR therapeutic procedures on joints	2	68.7867	2	34.5056
29888	152 - Arthroplasty knee	1	0	1	19.0528
29889	152 - Arthroplasty knee	2	72.4794	2	30.2712
29891	162 - Other OR therapeutic procedures on joints	2	68.7867	2	34.5056
29892	162 - Other OR therapeutic procedures on joints	2	68.7867	2	34.5056
29893	170 - Excision of skin lesion	2	88.4271	2	43.9092
29894	162 - Other OR therapeutic procedures on joints	2	68.7867	2	34.5056
29895	162 - Other OR therapeutic procedures on joints	2	68.7867	2	34.5056
29897	162 - Other OR therapeutic procedures on joints	2	68.7867	2	34.5056
29898	162 - Other OR therapeutic procedures on joints	2	68.7867	1	0
29899	162 - Other OR therapeutic procedures on joints	2	68.7867	2	34.5056
29901	162 - Other OR therapeutic procedures on joints	2	68.7867	2	34.5056
29999	149 - Arthroscopy	3	81.4145	2	0
30465	28 - Plastic procedures on nose	3	81.4145	3	53.5991
31300	42 - Other OR therapeutic procedures on respiratory system	2	85.1907	2	62.5915
31320	40 - Other diagnostic procedures of respiratory tract and mediastinum	3	81.4145	3	53.5991
31360	42 - Other OR therapeutic procedures on respiratory system	2	85.1907	1	54.6217
31365	42 - Other OR therapeutic procedures on respiratory system	2	85.1907	1	59.0452
31367	42 - Other OR therapeutic procedures on respiratory system	2	85.1907	2	62.5915
31368	42 - Other OR therapeutic procedures on respiratory system	2	85.1907	2	62.5915
31370	42 - Other OR therapeutic procedures on respiratory system	2	85.1907	2	62.5915
31375	42 - Other OR therapeutic procedures on respiratory system	2	85.1907	2	62.5915
31380	42 - Other OR therapeutic procedures on respiratory system	2	85.1907	2	62.5915
31382	42 - Other OR therapeutic procedures on respiratory system	2	85.1907	2	62.5915
31390	33 - Other OR therapeutic procedures on nose, mouth and pharynx	2	74.8338	2	42.8935
31395	33 - Other OR therapeutic procedures on nose, mouth and pharynx	2	74.8338	2	42.8935
31580	42 - Other OR therapeutic procedures on respiratory system	2	85.1907	2	62.5915
31587	42 - Other OR therapeutic procedures on respiratory system	2	85.1907	2	62.5915
31590	42 - Other OR therapeutic procedures on respiratory system	2	85.1907	2	62.5915
31599	42 - Other OR therapeutic procedures on respiratory system	2	85.1907	1	0
31611	42 - Other OR therapeutic procedures on respiratory system	2	85.1907	2	62.5915
31614	34 - Tracheostomy, temporary and permanent	3	81.4145	3	53.5991
31632	37 - Diagnostic bronchoscopy and biopsy of bronchus	3	81.4145	3	53.5991
31633	37 - Diagnostic bronchoscopy and biopsy of bronchus	3	81.4145	3	53.5991
31750	42 - Other OR therapeutic procedures on respiratory system	2	85.1907	2	62.5915
31755	42 - Other OR therapeutic procedures on respiratory system	2	85.1907	2	62.5915
31760	42 - Other OR therapeutic procedures on respiratory system	2	85.1907	2	62.5915
31780	42 - Other OR therapeutic procedures on respiratory system	2	85.1907	2	62.5915
31785	42 - Other OR therapeutic procedures on respiratory system	2	85.1907	2	62.5915
31800	42 - Other OR therapeutic procedures on respiratory system	2	85.1907	2	62.5915
31820	42 - Other OR therapeutic procedures on respiratory system	2	85.1907	2	62.5915
31825	42 - Other OR therapeutic procedures on respiratory system	2	85.1907	2	62.5915
31899	42 - Other OR therapeutic procedures on respiratory system	2	85.1907	2	62.5915
32005	41 - Other non-OR therapeutic procedures on respiratory system	3	81.4145	3	53.5991
32019	39 - Incision of pleura, thoracentesis, chest drainage	3	81.4145	3	53.5991
32035	39 - Incision of pleura, thoracentesis, chest drainage	3	81.4145	3	53.5991
32036	39 - Incision of pleura, thoracentesis, chest drainage	3	81.4145	3	53.5991
32095	38 - Other diagnostic procedures on lung and bronchus	1	93.7054	1	66.8273
32100	38 - Other diagnostic procedures on lung and bronchus	1	87.6229	1	63.8859
32110	42 - Other OR therapeutic procedures on respiratory system	2	85.1907	2	62.5915
32120	42 - Other OR therapeutic procedures on respiratory system	2	85.1907	1	83.0895
32124	42 - Other OR therapeutic procedures on respiratory system	2	85.1907	2	62.5915
32140	42 - Other OR therapeutic procedures on respiratory system	2	85.1907	2	62.5915
32141	42 - Other OR therapeutic procedures on respiratory system	2	85.1907	1	60.119
32150	42 - Other OR therapeutic procedures on respiratory system	2	85.1907	2	62.5915
32151	42 - Other OR therapeutic procedures on respiratory system	2	85.1907	2	62.5915
32160	49 - Other OR heart procedures	2	87.0033	2	64.1385
32200	42 - Other OR therapeutic procedures on respiratory system	2	85.1907	2	62.5915
32215	42 - Other OR therapeutic procedures on respiratory system	2	85.1907	2	62.5915
32220	42 - Other OR therapeutic procedures on respiratory system	2	85.1907	1	74.7215
32225	42 - Other OR therapeutic procedures on respiratory system	2	85.1907	1	79.1928
32310	42 - Other OR therapeutic procedures on respiratory system	2	85.1907	2	62.5915
32320	42 - Other OR therapeutic procedures on respiratory system	2	85.1907	1	68.2549
32402	40 - Other diagnostic procedures of respiratory tract and mediastinum	3	81.4145	3	53.5991
32440	36 - Lobectomy or pneumonectomy	2	85.0918	1	66.1695
32442	36 - Lobectomy or pneumonectomy	2	85.0918	3	53.5991
32445	36 - Lobectomy or pneumonectomy	2	85.0918	3	53.5991
32480	36 - Lobectomy or pneumonectomy	1	83.0328	1	60.7962
32482	36 - Lobectomy or pneumonectomy	2	85.0918	1	58.7522
32484	36 - Lobectomy or pneumonectomy	2	85.0918	1	60.119
32486	36 - Lobectomy or pneumonectomy	2	85.0918	3	53.5991
32488	36 - Lobectomy or pneumonectomy	2	85.0918	3	53.5991
32491	36 - Lobectomy or pneumonectomy	2	85.0918	3	53.5991
32500	36 - Lobectomy or pneumonectomy	1	76.217	1	55.5262
32503	42 - Other OR therapeutic procedures on respiratory system	2	85.1907	2	62.5915
32504	42 - Other OR therapeutic procedures on respiratory system	2	85.1907	2	62.5915
32540	42 - Other OR therapeutic procedures on respiratory system	2	85.1907	2	62.5915
32560	41 - Other non-OR therapeutic procedures on respiratory system	3	81.4145	3	53.5991
32650	42 - Other OR therapeutic procedures on respiratory system	1	93.9933	1	65.7426
32651	42 - Other OR therapeutic procedures on respiratory system	1	90.3192	1	71.0102
32652	42 - Other OR therapeutic procedures on respiratory system	1	76.1532	1	61.6812
32653	42 - Other OR therapeutic procedures on respiratory system	2	85.1907	1	56.4438
32654	42 - Other OR therapeutic procedures on respiratory system	2	85.1907	2	62.5915
32655	42 - Other OR therapeutic procedures on respiratory system	1	77.1915	1	45.1481
32656	42 - Other OR therapeutic procedures on respiratory system	2	85.1907	2	62.5915
32657	36 - Lobectomy or pneumonectomy	1	81.7682	1	45.1186
32658	49 - Other OR heart procedures	2	87.0033	2	64.1385
32659	49 - Other OR heart procedures	2	87.0033	1	78.4526
32661	49 - Other OR heart procedures	2	87.0033	2	64.1385
32662	42 - Other OR therapeutic procedures on respiratory system	2	85.1907	1	36.4145
32663	36 - Lobectomy or pneumonectomy	1	0	1	48.9973
32664	9 - Other OR therapeutic nervous system procedures	2	78.7796	1	26.7645
32665	94 - Other OR upper GI therapeutic procedures	2	85.0607	1	28.5539
32800	42 - Other OR therapeutic procedures on respiratory system	2	85.1907	2	62.5915
32810	42 - Other OR therapeutic procedures on respiratory system	2	85.1907	2	62.5915
32815	42 - Other OR therapeutic procedures on respiratory system	2	85.1907	2	62.5915
32820	42 - Other OR therapeutic procedures on respiratory system	2	85.1907	2	62.5915
32900	142 - Partial excision bone	2	77.1496	2	45.6248
32905	42 - Other OR therapeutic procedures on respiratory system	2	85.1907	2	62.5915
32906	42 - Other OR therapeutic procedures on respiratory system	2	85.1907	2	62.5915
32999	42 - Other OR therapeutic procedures on respiratory system	2	85.1907	2	62.5915
33020	49 - Other OR heart procedures	2	87.0033	2	64.1385
33025	49 - Other OR heart procedures	1	92.4073	1	64.6796
33030	49 - Other OR heart procedures	2	87.0033	2	64.1385
33031	49 - Other OR heart procedures	2	87.0033	2	64.1385
33050	49 - Other OR heart procedures	2	87.0033	2	64.1385
33120	49 - Other OR heart procedures	2	87.0033	2	64.1385
33130	49 - Other OR heart procedures	2	87.0033	2	64.1385
33140	44 - Coronary artery bypass graft (CABG)	2	81.9166	2	67.7089
33251	49 - Other OR heart procedures	2	87.0033	2	64.1385
33254	49 - Other OR heart procedures	2	87.0033	2	64.1385
33255	49 - Other OR heart procedures	2	87.0033	2	64.1385
33256	49 - Other OR heart procedures	2	87.0033	2	64.1385
33265	49 - Other OR heart procedures	2	87.0033	2	64.1385
33266	49 - Other OR heart procedures	2	87.0033	2	64.1385
33300	49 - Other OR heart procedures	2	87.0033	2	64.1385
33305	49 - Other OR heart procedures	2	87.0033	2	64.1385
33310	49 - Other OR heart procedures	2	87.0033	2	64.1385
33315	49 - Other OR heart procedures	2	87.0033	2	64.1385
33320	61 - Other OR procedures on vessels other than head and neck	2	86.4124	2	60.4039
33321	61 - Other OR procedures on vessels other than head and neck	2	86.4124	2	60.4039
33322	61 - Other OR procedures on vessels other than head and neck	2	86.4124	2	60.4039
33330	52 - Aortic resection, replacement or anastomosis	2	91.5079	2	73.897
33400	43 - Heart valve procedures	2	79.248	2	64.5729
33404	43 - Heart valve procedures	2	79.248	2	64.5729
33405	43 - Heart valve procedures	1	86.0974	1	60.5502
33406	43 - Heart valve procedures	2	79.248	1	78.4526
33410	43 - Heart valve procedures	2	79.248	1	68.819
33411	43 - Heart valve procedures	2	79.248	2	64.5729
33412	43 - Heart valve procedures	2	79.248	2	64.5729
33413	43 - Heart valve procedures	2	79.248	2	64.5729
33414	43 - Heart valve procedures	2	79.248	2	64.5729
33416	43 - Heart valve procedures	2	79.248	2	64.5729
33422	43 - Heart valve procedures	2	79.248	2	64.5729
33425	43 - Heart valve procedures	2	79.248	2	64.5729
33426	43 - Heart valve procedures	1	0	1	59.5055
33427	43 - Heart valve procedures	2	79.248	1	49.5535
33430	43 - Heart valve procedures	1	81.8623	1	77.8718
33463	43 - Heart valve procedures	2	79.248	2	64.5729
33464	43 - Heart valve procedures	2	79.248	2	64.5729
33465	43 - Heart valve procedures	2	79.248	2	64.5729
33475	43 - Heart valve procedures	2	79.248	2	64.5729
33478	43 - Heart valve procedures	2	79.248	2	64.5729
33496	43 - Heart valve procedures	2	79.248	2	64.5729
33501	49 - Other OR heart procedures	2	87.0033	2	64.1385
33502	49 - Other OR heart procedures	2	87.0033	2	64.1385
33506	49 - Other OR heart procedures	2	87.0033	2	64.1385
33508	61 - Other OR procedures on vessels other than head and neck	2	86.4124	2	60.4039
33510	44 - Coronary artery bypass graft (CABG)	2	81.9166	1	55.5637
33511	44 - Coronary artery bypass graft (CABG)	1	81.944	1	66.561
33512	44 - Coronary artery bypass graft (CABG)	2	81.9166	1	70.1428
33513	44 - Coronary artery bypass graft (CABG)	2	81.9166	1	70.8443
33514	44 - Coronary artery bypass graft (CABG)	2	81.9166	2	67.7089
33516	44 - Coronary artery bypass graft (CABG)	2	81.9166	2	67.7089
33517	44 - Coronary artery bypass graft (CABG)	1	0	1	64.1243
33518	44 - Coronary artery bypass graft (CABG)	1	80.0837	1	55.0622
33519	44 - Coronary artery bypass graft (CABG)	1	77.623	1	58.9626
33521	44 - Coronary artery bypass graft (CABG)	2	81.9166	1	68.819
33522	44 - Coronary artery bypass graft (CABG)	2	81.9166	2	67.7089
33523	44 - Coronary artery bypass graft (CABG)	2	81.9166	2	67.7089
33530	44 - Coronary artery bypass graft (CABG)	2	81.9166	2	67.7089
33533	44 - Coronary artery bypass graft (CABG)	1	82.9979	1	58.2245
33534	44 - Coronary artery bypass graft (CABG)	1	80.1041	1	52.3577
33535	44 - Coronary artery bypass graft (CABG)	2	81.9166	2	67.7089
33536	44 - Coronary artery bypass graft (CABG)	2	81.9166	2	67.7089
33542	49 - Other OR heart procedures	2	87.0033	2	64.1385
33545	49 - Other OR heart procedures	2	87.0033	2	64.1385
33548	49 - Other OR heart procedures	2	87.0033	2	64.1385
33572	49 - Other OR heart procedures	2	87.0033	1	41.3052
33641	49 - Other OR heart procedures	2	87.0033	2	64.1385
33681	49 - Other OR heart procedures	2	87.0033	2	64.1385
33720	49 - Other OR heart procedures	2	87.0033	2	64.1385
33724	49 - Other OR heart procedures	2	87.0033	2	64.1385
33768	56 - Other vascular bypass and shunt, not heart	2	87.6056	2	60.119
33800	61 - Other OR procedures on vessels other than head and neck	2	86.4124	2	60.4039
33802	52 - Aortic resection, replacement or anastomosis	2	91.5079	2	73.897
33803	52 - Aortic resection, replacement or anastomosis	2	91.5079	2	73.897
33845	52 - Aortic resection, replacement or anastomosis	2	91.5079	2	73.897
33853	52 - Aortic resection, replacement or anastomosis	2	91.5079	2	73.897
33860	52 - Aortic resection, replacement or anastomosis	1	84.5097	1	79.2669
33861	52 - Aortic resection, replacement or anastomosis	2	91.5079	2	73.897
33863	52 - Aortic resection, replacement or anastomosis	2	91.5079	1	69.7247
33864	52 - Aortic resection, replacement or anastomosis	2	91.5079	2	73.897
33870	52 - Aortic resection, replacement or anastomosis	2	91.5079	2	73.897
33875	52 - Aortic resection, replacement or anastomosis	2	91.5079	1	82.7598
33877	52 - Aortic resection, replacement or anastomosis	1	93.3557	1	91.4237
33880	52 - Aortic resection, replacement or anastomosis	1	91.2724	1	74.9218
33881	52 - Aortic resection, replacement or anastomosis	1	87.2231	1	65.5811
33883	52 - Aortic resection, replacement or anastomosis	2	91.5079	1	47.7165
33884	52 - Aortic resection, replacement or anastomosis	2	91.5079	2	73.897
33886	52 - Aortic resection, replacement or anastomosis	2	91.5079	2	73.897
33889	59 - Other OR procedures on vessels of head and neck	2	85.3072	2	61.4024
33891	59 - Other OR procedures on vessels of head and neck	2	85.3072	2	61.4024
33910	61 - Other OR procedures on vessels other than head and neck	2	86.4124	2	60.4039
33915	61 - Other OR procedures on vessels other than head and neck	2	86.4124	2	60.4039
33916	61 - Other OR procedures on vessels other than head and neck	2	86.4124	2	60.4039
33999	49 - Other OR heart procedures	2	87.0033	2	64.1385
34001	59 - Other OR procedures on vessels of head and neck	2	85.3072	1	50.4277
34051	61 - Other OR procedures on vessels other than head and neck	2	86.4124	2	60.4039
34101	61 - Other OR procedures on vessels other than head and neck	1	92.3168	1	61.0629
34111	61 - Other OR procedures on vessels other than head and neck	1	92.2617	1	69.2336
34151	61 - Other OR procedures on vessels other than head and neck	1	98.467	1	91.5672
34201	60 - Embolectomy and endarterectomy of lower limbs	1	93.8422	1	71.048
34203	60 - Embolectomy and endarterectomy of lower limbs	1	91.659	1	69.7047
34401	61 - Other OR procedures on vessels other than head and neck	2	86.4124	2	60.4039
34421	60 - Embolectomy and endarterectomy of lower limbs	2	88.0417	1	62.0596
34451	60 - Embolectomy and endarterectomy of lower limbs	2	88.0417	1	60.119
34471	59 - Other OR procedures on vessels of head and neck	2	85.3072	2	61.4024
34490	61 - Other OR procedures on vessels other than head and neck	2	86.4124	1	51.8859
34501	61 - Other OR procedures on vessels other than head and neck	2	86.4124	2	60.4039
34502	61 - Other OR procedures on vessels other than head and neck	2	86.4124	2	60.4039
34510	61 - Other OR procedures on vessels other than head and neck	2	86.4124	2	60.4039
34520	55 - Peripheral vascular bypass	2	83.2052	2	54.0148
34530	61 - Other OR procedures on vessels other than head and neck	2	86.4124	2	60.4039
34800	61 - Other OR procedures on vessels other than head and neck	1	84.2177	1	59.4116
34802	61 - Other OR procedures on vessels other than head and neck	1	78.5132	1	43.56
34803	61 - Other OR procedures on vessels other than head and neck	1	79.7301	1	43.6154
34804	61 - Other OR procedures on vessels other than head and neck	1	78.6726	1	41.3052
34805	61 - Other OR procedures on vessels other than head and neck	1	86.2328	1	60.6985
34808	61 - Other OR procedures on vessels other than head and neck	2	86.4124	2	60.4039
34812	61 - Other OR procedures on vessels other than head and neck	1	81.078	1	54.2386
34813	61 - Other OR procedures on vessels other than head and neck	2	86.4124	2	60.4039
34820	61 - Other OR procedures on vessels other than head and neck	2	86.4124	2	60.4039
34825	61 - Other OR procedures on vessels other than head and neck	1	81.2735	1	46.5933
34826	61 - Other OR procedures on vessels other than head and neck	2	86.4124	2	60.4039
34830	52 - Aortic resection, replacement or anastomosis	2	91.5079	1	74.7215
34831	52 - Aortic resection, replacement or anastomosis	2	91.5079	1	68.1168
34832	52 - Aortic resection, replacement or anastomosis	2	91.5079	2	73.897
34833	61 - Other OR procedures on vessels other than head and neck	2	86.4124	2	60.4039
34834	61 - Other OR procedures on vessels other than head and neck	2	86.4124	2	60.4039
34900	61 - Other OR procedures on vessels other than head and neck	1	75.9352	1	40.9396
35001	59 - Other OR procedures on vessels of head and neck	1	80.9564	1	62.2394
35002	59 - Other OR procedures on vessels of head and neck	2	85.3072	2	61.4024
35005	59 - Other OR procedures on vessels of head and neck	2	85.3072	2	61.4024
35011	61 - Other OR procedures on vessels other than head and neck	1	0	1	48.0147
35013	61 - Other OR procedures on vessels other than head and neck	2	86.4124	2	60.4039
35021	61 - Other OR procedures on vessels other than head and neck	2	86.4124	2	60.4039
35045	61 - Other OR procedures on vessels other than head and neck	2	86.4124	1	46.1661
35081	52 - Aortic resection, replacement or anastomosis	1	85.7922	1	68.0424
35082	52 - Aortic resection, replacement or anastomosis	1	100	1	100
35091	52 - Aortic resection, replacement or anastomosis	1	88.5616	1	73.1051
35092	52 - Aortic resection, replacement or anastomosis	2	91.5079	1	96.876
35102	52 - Aortic resection, replacement or anastomosis	1	86.5238	1	67.8625
35103	52 - Aortic resection, replacement or anastomosis	1	97.9125	1	93.208
35111	61 - Other OR procedures on vessels other than head and neck	2	86.4124	1	53.8835
35112	61 - Other OR procedures on vessels other than head and neck	2	86.4124	2	60.4039
35121	61 - Other OR procedures on vessels other than head and neck	1	85.7703	1	56.9488
35122	61 - Other OR procedures on vessels other than head and neck	2	86.4124	2	60.4039
35131	61 - Other OR procedures on vessels other than head and neck	1	79.8053	1	59.0452
35132	61 - Other OR procedures on vessels other than head and neck	2	86.4124	1	77.0861
35141	61 - Other OR procedures on vessels other than head and neck	1	83.1652	1	50.2907
35142	61 - Other OR procedures on vessels other than head and neck	1	91.4334	1	71.339
35151	61 - Other OR procedures on vessels other than head and neck	1	73.5217	1	33.758
35152	61 - Other OR procedures on vessels other than head and neck	2	86.4124	2	60.4039
35182	61 - Other OR procedures on vessels other than head and neck	2	86.4124	2	60.4039
35184	61 - Other OR procedures on vessels other than head and neck	2	86.4124	2	60.4039
35188	59 - Other OR procedures on vessels of head and neck	2	85.3072	2	61.4024
35189	61 - Other OR procedures on vessels other than head and neck	2	86.4124	2	60.4039
35190	61 - Other OR procedures on vessels other than head and neck	1	76.1215	1	37.2987
35201	61 - Other OR procedures on vessels other than head and neck	2	86.4124	1	77.5073
35206	61 - Other OR procedures on vessels other than head and neck	1	89.4202	1	47.8376
35207	61 - Other OR procedures on vessels other than head and neck	2	86.4124	2	60.4039
35211	61 - Other OR procedures on vessels other than head and neck	2	86.4124	2	60.4039
35216	61 - Other OR procedures on vessels other than head and neck	2	86.4124	2	60.4039
35221	61 - Other OR procedures on vessels other than head and neck	1	92.1767	1	77.2914
35226	61 - Other OR procedures on vessels other than head and neck	1	86.7301	1	66.711
35231	59 - Other OR procedures on vessels of head and neck	2	85.3072	2	61.4024
35236	61 - Other OR procedures on vessels other than head and neck	2	86.4124	1	44.6969
35246	61 - Other OR procedures on vessels other than head and neck	2	86.4124	2	60.4039
35251	61 - Other OR procedures on vessels other than head and neck	2	86.4124	2	60.4039
35256	61 - Other OR procedures on vessels other than head and neck	1	86.6729	1	57.9934
35261	59 - Other OR procedures on vessels of head and neck	2	85.3072	2	61.4024
35266	61 - Other OR procedures on vessels other than head and neck	2	86.4124	1	51.2826
35271	61 - Other OR procedures on vessels other than head and neck	2	86.4124	2	60.4039
35281	61 - Other OR procedures on vessels other than head and neck	2	86.4124	2	60.4039
35286	61 - Other OR procedures on vessels other than head and neck	1	90.331	1	52.6692
35301	51 - Endarterectomy, vessel of head and neck	1	75.0654	1	38.8181
35302	60 - Embolectomy and endarterectomy of lower limbs	1	84.5015	1	49.6271
35303	60 - Embolectomy and endarterectomy of lower limbs	1	83.385	1	55.1573
35304	60 - Embolectomy and endarterectomy of lower limbs	2	88.0417	2	51.2826
35305	60 - Embolectomy and endarterectomy of lower limbs	2	88.0417	2	51.2826
35306	60 - Embolectomy and endarterectomy of lower limbs	2	88.0417	2	51.2826
35311	61 - Other OR procedures on vessels other than head and neck	2	86.4124	2	60.4039
35321	61 - Other OR procedures on vessels other than head and neck	2	86.4124	1	42.2119
35331	61 - Other OR procedures on vessels other than head and neck	2	86.4124	1	65.2173
35341	61 - Other OR procedures on vessels other than head and neck	2	86.4124	1	80.178
35351	61 - Other OR procedures on vessels other than head and neck	1	83.2488	1	48.4764
35355	60 - Embolectomy and endarterectomy of lower limbs	1	83.5819	1	52.8551
35361	60 - Embolectomy and endarterectomy of lower limbs	2	88.0417	2	51.2826
35363	60 - Embolectomy and endarterectomy of lower limbs	2	88.0417	1	69.6584
35371	60 - Embolectomy and endarterectomy of lower limbs	1	85.3866	1	51.1634
35372	60 - Embolectomy and endarterectomy of lower limbs	1	82.9732	1	52.2059
35381	60 - Embolectomy and endarterectomy of lower limbs	2	88.0417	1	60.119
35390	51 - Endarterectomy, vessel of head and neck	3	81.4145	1	52.5188
35500	61 - Other OR procedures on vessels other than head and neck	2	86.4124	2	60.4039
35501	56 - Other vascular bypass and shunt, not heart	2	87.6056	1	44.6291
35506	56 - Other vascular bypass and shunt, not heart	2	87.6056	1	52.7996
35507	56 - Other vascular bypass and shunt, not heart	2	87.6056	2	60.119
35508	56 - Other vascular bypass and shunt, not heart	2	87.6056	2	60.119
35509	56 - Other vascular bypass and shunt, not heart	2	87.6056	2	60.119
35510	56 - Other vascular bypass and shunt, not heart	2	87.6056	2	60.119
35511	56 - Other vascular bypass and shunt, not heart	2	87.6056	2	60.119
35512	56 - Other vascular bypass and shunt, not heart	2	87.6056	2	60.119
35515	56 - Other vascular bypass and shunt, not heart	2	87.6056	2	60.119
35516	55 - Peripheral vascular bypass	2	83.2052	2	54.0148
35518	55 - Peripheral vascular bypass	2	83.2052	2	54.0148
35521	55 - Peripheral vascular bypass	1	84.6756	1	58.6521
35522	55 - Peripheral vascular bypass	2	83.2052	1	31.943
35523	55 - Peripheral vascular bypass	2	83.2052	2	54.0148
35525	55 - Peripheral vascular bypass	2	83.2052	1	51.0489
35526	56 - Other vascular bypass and shunt, not heart	2	87.6056	2	60.119
35531	56 - Other vascular bypass and shunt, not heart	2	87.6056	1	82.3638
35533	55 - Peripheral vascular bypass	2	83.2052	1	65.6865
35536	56 - Other vascular bypass and shunt, not heart	2	87.6056	2	60.119
35537	55 - Peripheral vascular bypass	2	83.2052	2	54.0148
35538	55 - Peripheral vascular bypass	2	83.2052	1	68.819
35539	55 - Peripheral vascular bypass	2	83.2052	1	74.9218
35540	55 - Peripheral vascular bypass	1	89.3635	1	66.667
35541	55 - Peripheral vascular bypass	2	83.2052	2	54.0148
35546	55 - Peripheral vascular bypass	2	83.2052	1	67.3544
35548	55 - Peripheral vascular bypass	2	83.2052	1	68.0188
35549	55 - Peripheral vascular bypass	2	83.2052	1	66.5233
35551	55 - Peripheral vascular bypass	2	83.2052	1	54.6217
35556	55 - Peripheral vascular bypass	1	80.137	1	48.6528
35558	55 - Peripheral vascular bypass	1	86.5602	1	57.6178
35560	56 - Other vascular bypass and shunt, not heart	2	87.6056	1	59.7072
35563	56 - Other vascular bypass and shunt, not heart	2	87.6056	2	60.119
35565	55 - Peripheral vascular bypass	1	83.3166	1	54.9764
35566	55 - Peripheral vascular bypass	1	81.8745	1	53.1378
35571	55 - Peripheral vascular bypass	1	83.1051	1	53.9015
35572	61 - Other OR procedures on vessels other than head and neck	2	86.4124	2	60.4039
35583	55 - Peripheral vascular bypass	1	80.2626	1	45.2317
35585	55 - Peripheral vascular bypass	1	83.1403	1	55.4572
35587	55 - Peripheral vascular bypass	2	83.2052	1	48.1666
35601	56 - Other vascular bypass and shunt, not heart	2	87.6056	1	56.3514
35606	56 - Other vascular bypass and shunt, not heart	1	84.0252	1	58.4003
35612	56 - Other vascular bypass and shunt, not heart	2	87.6056	2	60.119
35616	55 - Peripheral vascular bypass	2	83.2052	2	54.0148
35621	55 - Peripheral vascular bypass	1	89.1963	1	67.6017
35623	55 - Peripheral vascular bypass	2	83.2052	1	74.1331
35626	56 - Other vascular bypass and shunt, not heart	2	87.6056	1	68.0188
35631	56 - Other vascular bypass and shunt, not heart	1	89.9829	1	80.4912
35636	56 - Other vascular bypass and shunt, not heart	2	87.6056	2	60.119
35637	56 - Other vascular bypass and shunt, not heart	2	87.6056	1	67.1799
35638	56 - Other vascular bypass and shunt, not heart	1	86.013	1	68.819
35641	55 - Peripheral vascular bypass	2	83.2052	1	67.7089
35642	56 - Other vascular bypass and shunt, not heart	2	87.6056	2	60.119
35645	56 - Other vascular bypass and shunt, not heart	2	87.6056	2	60.119
35646	55 - Peripheral vascular bypass	1	83.6275	1	64.9471
35647	55 - Peripheral vascular bypass	1	72.8949	1	55.3657
35650	55 - Peripheral vascular bypass	2	83.2052	1	36.8755
35651	55 - Peripheral vascular bypass	2	83.2052	1	54.6217
35654	55 - Peripheral vascular bypass	1	93.0484	1	72.798
35656	55 - Peripheral vascular bypass	1	82.9206	1	50.2758
35661	55 - Peripheral vascular bypass	1	83.1723	1	51.5276
35663	56 - Other vascular bypass and shunt, not heart	2	87.6056	2	60.119
35665	55 - Peripheral vascular bypass	1	82.5842	1	53.2925
35666	55 - Peripheral vascular bypass	1	84.3594	1	57.7496
35671	55 - Peripheral vascular bypass	2	83.2052	1	51.1986
35681	61 - Other OR procedures on vessels other than head and neck	2	86.4124	2	60.4039
35682	61 - Other OR procedures on vessels other than head and neck	2	86.4124	2	60.4039
35683	61 - Other OR procedures on vessels other than head and neck	2	86.4124	2	60.4039
35685	55 - Peripheral vascular bypass	2	83.2052	2	54.0148
35686	55 - Peripheral vascular bypass	2	83.2052	2	54.0148
35691	59 - Other OR procedures on vessels of head and neck	2	85.3072	2	61.4024
35693	59 - Other OR procedures on vessels of head and neck	2	85.3072	2	61.4024
35694	59 - Other OR procedures on vessels of head and neck	2	85.3072	1	56.0598
35695	59 - Other OR procedures on vessels of head and neck	2	85.3072	2	61.4024
35697	59 - Other OR procedures on vessels of head and neck	2	85.3072	2	61.4024
35700	60 - Embolectomy and endarterectomy of lower limbs	1	79.248	1	52.7996
35701	59 - Other OR procedures on vessels of head and neck	2	85.3072	1	31.6811
35721	61 - Other OR procedures on vessels other than head and neck	1	89.1347	1	65.0756
35741	61 - Other OR procedures on vessels other than head and neck	2	86.4124	1	46.4602
35761	61 - Other OR procedures on vessels other than head and neck	1	82.5479	1	48.3982
35800	59 - Other OR procedures on vessels of head and neck	2	85.3072	1	66.667
35820	61 - Other OR procedures on vessels other than head and neck	2	86.4124	1	69.5512
35840	61 - Other OR procedures on vessels other than head and neck	1	92.4785	1	78.8265
35860	61 - Other OR procedures on vessels other than head and neck	1	88.6637	1	61.5475
35870	61 - Other OR procedures on vessels other than head and neck	2	86.4124	2	60.4039
35875	61 - Other OR procedures on vessels other than head and neck	1	82.2531	1	51.7244
35876	61 - Other OR procedures on vessels other than head and neck	1	84.6129	1	53.0791
35879	61 - Other OR procedures on vessels other than head and neck	1	77.6912	1	42.6057
35881	61 - Other OR procedures on vessels other than head and neck	1	76.8604	1	45.5784
35883	61 - Other OR procedures on vessels other than head and neck	1	78.9874	1	48.0835
35884	61 - Other OR procedures on vessels other than head and neck	2	86.4124	2	60.4039
35901	51 - Endarterectomy, vessel of head and neck	3	81.4145	3	53.5991
35903	60 - Embolectomy and endarterectomy of lower limbs	1	84.908	1	55.1817
35905	61 - Other OR procedures on vessels other than head and neck	2	86.4124	2	60.4039
35907	61 - Other OR procedures on vessels other than head and neck	1	95.311	1	86.3806
36475	63 - Other non-OR therapeutic cardiovascular procedures	1	58.5978	1	17.1627
36476	63 - Other non-OR therapeutic cardiovascular procedures	3	81.4145	3	53.5991
36478	63 - Other non-OR therapeutic cardiovascular procedures	1	0	1	0
36479	63 - Other non-OR therapeutic cardiovascular procedures	3	81.4145	3	53.5991
36818	57 - Creation, revision and removal of arteriovenous fistula or vessel-to-vessel cannula for dialysis	1	75.6728	1	37.412
36819	57 - Creation, revision and removal of arteriovenous fistula or vessel-to-vessel cannula for dialysis	1	78.3317	1	42.315
36820	57 - Creation, revision and removal of arteriovenous fistula or vessel-to-vessel cannula for dialysis	3	81.4145	1	46.4602
36821	57 - Creation, revision and removal of arteriovenous fistula or vessel-to-vessel cannula for dialysis	1	76.9203	1	41.8397
36834	57 - Creation, revision and removal of arteriovenous fistula or vessel-to-vessel cannula for dialysis	1	75.11	1	38.0854
36838	63 - Other non-OR therapeutic cardiovascular procedures	1	73.2664	1	38.5741
36860	61 - Other OR procedures on vessels other than head and neck	2	86.4124	2	60.4039
36861	61 - Other OR procedures on vessels other than head and neck	2	86.4124	2	60.4039
36870	61 - Other OR procedures on vessels other than head and neck	2	86.4124	2	60.4039
37140	56 - Other vascular bypass and shunt, not heart	2	87.6056	2	60.119
37145	56 - Other vascular bypass and shunt, not heart	2	87.6056	2	60.119
37160	56 - Other vascular bypass and shunt, not heart	2	87.6056	2	60.119
37180	56 - Other vascular bypass and shunt, not heart	2	87.6056	2	60.119
37181	56 - Other vascular bypass and shunt, not heart	2	87.6056	2	60.119
37182	56 - Other vascular bypass and shunt, not heart	2	87.6056	2	60.119
37183	56 - Other vascular bypass and shunt, not heart	2	87.6056	2	60.119
37184	61 - Other OR procedures on vessels other than head and neck	2	86.4124	2	60.4039
37185	61 - Other OR procedures on vessels other than head and neck	2	86.4124	2	60.4039
37187	61 - Other OR procedures on vessels other than head and neck	2	86.4124	2	60.4039
37188	61 - Other OR procedures on vessels other than head and neck	2	86.4124	2	60.4039
37201	54 - Other vascular catheterization, not heart	3	81.4145	2	63.0562
37202	54 - Other vascular catheterization, not heart	3	81.4145	2	63.0562
37203	54 - Other vascular catheterization, not heart	3	81.4145	2	63.0562
37204	61 - Other OR procedures on vessels other than head and neck	2	86.4124	2	60.4039
37215	59 - Other OR procedures on vessels of head and neck	2	85.3072	2	61.4024
37216	59 - Other OR procedures on vessels of head and neck	2	85.3072	2	61.4024
37500	61 - Other OR procedures on vessels other than head and neck	2	86.4124	1	0
37501	62 - Other diagnostic cardiovascular procedures	3	81.4145	3	53.5991
37565	59 - Other OR procedures on vessels of head and neck	2	85.3072	2	61.4024
37600	59 - Other OR procedures on vessels of head and neck	2	85.3072	2	61.4024
37605	59 - Other OR procedures on vessels of head and neck	2	85.3072	2	61.4024
37606	59 - Other OR procedures on vessels of head and neck	2	85.3072	2	61.4024
37607	61 - Other OR procedures on vessels other than head and neck	1	82.3304	1	44.5869
37615	59 - Other OR procedures on vessels of head and neck	2	85.3072	2	61.4024
37616	61 - Other OR procedures on vessels other than head and neck	2	86.4124	2	60.4039
37617	61 - Other OR procedures on vessels other than head and neck	2	86.4124	1	73.6253
37618	61 - Other OR procedures on vessels other than head and neck	2	86.4124	1	56.3146
37620	61 - Other OR procedures on vessels other than head and neck	2	86.4124	1	90.9876
37650	61 - Other OR procedures on vessels other than head and neck	2	86.4124	2	60.4039
37660	61 - Other OR procedures on vessels other than head and neck	2	86.4124	2	60.4039
37700	53 - Varicose vein stripping, lower limb	1	0	1	18.5981
37718	53 - Varicose vein stripping, lower limb	1	74.3647	1	21.4015
37720	53 - Varicose vein stripping, lower limb	1	0	1	0
37722	53 - Varicose vein stripping, lower limb	1	0	1	15.0297
37730	53 - Varicose vein stripping, lower limb	2	0	3	53.5991
37735	53 - Varicose vein stripping, lower limb	2	0	1	0
37760	53 - Varicose vein stripping, lower limb	1	0	1	0
37765	53 - Varicose vein stripping, lower limb	1	0	1	10.1037
37766	53 - Varicose vein stripping, lower limb	1	63.5787	1	18.1514
37780	53 - Varicose vein stripping, lower limb	2	0	1	0
37785	53 - Varicose vein stripping, lower limb	2	0	1	26.1389
37788	61 - Other OR procedures on vessels other than head and neck	2	86.4124	2	60.4039
37799	61 - Other OR procedures on vessels other than head and neck	1	78.0979	1	43.4613
38100	66 - Procedures on spleen	1	85.7358	1	67.9754
38101	66 - Procedures on spleen	2	84.2488	2	76.7041
38102	66 - Procedures on spleen	2	84.2488	1	63.3623
38115	66 - Procedures on spleen	2	84.2488	2	76.7041
38120	66 - Procedures on spleen	1	80.8239	1	48.8487
38129	66 - Procedures on spleen	2	84.2488	1	0
38220	65 - Bone marrow biopsy	3	81.4145	3	53.5991
38221	65 - Bone marrow biopsy	3	81.4145	3	53.5991
38230	67 - Other therapeutic procedures, hemic and lymphatic system	2	76.5063	1	0
38300	67 - Other therapeutic procedures, hemic and lymphatic system	2	76.5063	2	43.2038
38305	67 - Other therapeutic procedures, hemic and lymphatic system	2	76.5063	2	43.2038
38308	67 - Other therapeutic procedures, hemic and lymphatic system	2	76.5063	1	29.2681
38380	67 - Other therapeutic procedures, hemic and lymphatic system	2	76.5063	2	43.2038
38381	67 - Other therapeutic procedures, hemic and lymphatic system	2	76.5063	2	43.2038
38382	67 - Other therapeutic procedures, hemic and lymphatic system	2	76.5063	2	43.2038
38542	67 - Other therapeutic procedures, hemic and lymphatic system	1	0	1	30.3793
38550	67 - Other therapeutic procedures, hemic and lymphatic system	2	76.5063	2	43.2038
38555	67 - Other therapeutic procedures, hemic and lymphatic system	2	76.5063	2	43.2038
38562	67 - Other therapeutic procedures, hemic and lymphatic system	2	76.5063	1	50.1551
38564	67 - Other therapeutic procedures, hemic and lymphatic system	2	76.5063	1	53.529
38570	67 - Other therapeutic procedures, hemic and lymphatic system	1	0	1	38.1393
38571	67 - Other therapeutic procedures, hemic and lymphatic system	2	76.5063	2	43.2038
38572	67 - Other therapeutic procedures, hemic and lymphatic system	2	76.5063	2	43.2038
38589	67 - Other therapeutic procedures, hemic and lymphatic system	2	76.5063	1	0
38700	67 - Other therapeutic procedures, hemic and lymphatic system	2	76.5063	1	45.3265
38720	67 - Other therapeutic procedures, hemic and lymphatic system	1	76.8247	1	38.6962
38724	67 - Other therapeutic procedures, hemic and lymphatic system	1	71.9797	1	34.756
38740	67 - Other therapeutic procedures, hemic and lymphatic system	1	78.762	1	30.8278
38745	67 - Other therapeutic procedures, hemic and lymphatic system	1	62.8939	1	25.747
38746	67 - Other therapeutic procedures, hemic and lymphatic system	2	76.5063	2	43.2038
38747	67 - Other therapeutic procedures, hemic and lymphatic system	2	76.5063	1	48.0525
38760	67 - Other therapeutic procedures, hemic and lymphatic system	1	72.3966	1	39.2334
38765	67 - Other therapeutic procedures, hemic and lymphatic system	1	0	1	45.1734
38770	67 - Other therapeutic procedures, hemic and lymphatic system	2	76.5063	1	46.4602
38780	67 - Other therapeutic procedures, hemic and lymphatic system	2	76.5063	1	49.6271
38999	67 - Other therapeutic procedures, hemic and lymphatic system	1	73.96	1	26.3821
39000	42 - Other OR therapeutic procedures on respiratory system	2	85.1907	2	62.5915
39010	42 - Other OR therapeutic procedures on respiratory system	2	85.1907	1	62.8553
39200	42 - Other OR therapeutic procedures on respiratory system	2	85.1907	2	62.5915
39220	42 - Other OR therapeutic procedures on respiratory system	2	85.1907	2	62.5915
39400	40 - Other diagnostic procedures of respiratory tract and mediastinum	1	78.7702	1	40.6879
39499	42 - Other OR therapeutic procedures on respiratory system	2	85.1907	2	62.5915
39501	42 - Other OR therapeutic procedures on respiratory system	2	85.1907	2	62.5915
39502	86 - Other hernia repair	1	80.4065	1	57.796
39503	86 - Other hernia repair	2	78.5069	2	47.7165
39520	86 - Other hernia repair	1	0	1	44.9724
39530	86 - Other hernia repair	2	78.5069	1	62.3643
39531	86 - Other hernia repair	2	78.5069	2	47.7165
39540	86 - Other hernia repair	2	78.5069	1	45.3265
39541	86 - Other hernia repair	2	78.5069	1	59.3065
39545	42 - Other OR therapeutic procedures on respiratory system	2	85.1907	2	62.5915
39560	42 - Other OR therapeutic procedures on respiratory system	2	85.1907	2	62.5915
39561	42 - Other OR therapeutic procedures on respiratory system	2	85.1907	2	62.5915
39599	42 - Other OR therapeutic procedures on respiratory system	1	77.1664	1	45.9092
40500	33 - Other OR therapeutic procedures on nose, mouth and pharynx	2	74.8338	2	42.8935
40510	33 - Other OR therapeutic procedures on nose, mouth and pharynx	2	74.8338	2	42.8935
40520	33 - Other OR therapeutic procedures on nose, mouth and pharynx	2	74.8338	2	42.8935
40525	33 - Other OR therapeutic procedures on nose, mouth and pharynx	2	74.8338	2	42.8935
40527	33 - Other OR therapeutic procedures on nose, mouth and pharynx	2	74.8338	2	42.8935
40530	33 - Other OR therapeutic procedures on nose, mouth and pharynx	2	74.8338	2	42.8935
40650	33 - Other OR therapeutic procedures on nose, mouth and pharynx	2	74.8338	2	42.8935
40654	33 - Other OR therapeutic procedures on nose, mouth and pharynx	2	74.8338	2	42.8935
40701	33 - Other OR therapeutic procedures on nose, mouth and pharynx	2	74.8338	2	42.8935
40720	33 - Other OR therapeutic procedures on nose, mouth and pharynx	2	74.8338	2	42.8935
40800	33 - Other OR therapeutic procedures on nose, mouth and pharynx	2	74.8338	2	42.8935
40801	33 - Other OR therapeutic procedures on nose, mouth and pharynx	2	74.8338	2	42.8935
40804	229 - Nonoperative removal of foreign body	3	81.4145	3	53.5991
40810	33 - Other OR therapeutic procedures on nose, mouth and pharynx	2	74.8338	2	42.8935
40812	33 - Other OR therapeutic procedures on nose, mouth and pharynx	2	74.8338	2	42.8935
40814	33 - Other OR therapeutic procedures on nose, mouth and pharynx	2	74.8338	2	42.8935
40816	33 - Other OR therapeutic procedures on nose, mouth and pharynx	2	74.8338	2	42.8935
40818	172 - Skin graft	2	72.6316	2	42.6963
41000	33 - Other OR therapeutic procedures on nose, mouth and pharynx	2	74.8338	2	42.8935
41008	33 - Other OR therapeutic procedures on nose, mouth and pharynx	2	74.8338	2	42.8935
41009	33 - Other OR therapeutic procedures on nose, mouth and pharynx	2	74.8338	2	42.8935
41016	33 - Other OR therapeutic procedures on nose, mouth and pharynx	2	74.8338	2	42.8935
41017	33 - Other OR therapeutic procedures on nose, mouth and pharynx	2	74.8338	2	42.8935
41110	33 - Other OR therapeutic procedures on nose, mouth and pharynx	2	74.8338	2	42.8935
41112	33 - Other OR therapeutic procedures on nose, mouth and pharynx	2	74.8338	1	0
41113	33 - Other OR therapeutic procedures on nose, mouth and pharynx	2	74.8338	2	42.8935
41114	33 - Other OR therapeutic procedures on nose, mouth and pharynx	2	74.8338	2	42.8935
41116	33 - Other OR therapeutic procedures on nose, mouth and pharynx	2	74.8338	2	42.8935
41120	33 - Other OR therapeutic procedures on nose, mouth and pharynx	2	74.8338	1	34.0584
41130	33 - Other OR therapeutic procedures on nose, mouth and pharynx	2	74.8338	2	42.8935
41135	33 - Other OR therapeutic procedures on nose, mouth and pharynx	2	74.8338	2	42.8935
41140	33 - Other OR therapeutic procedures on nose, mouth and pharynx	2	74.8338	2	42.8935
41145	33 - Other OR therapeutic procedures on nose, mouth and pharynx	2	74.8338	2	42.8935
41150	33 - Other OR therapeutic procedures on nose, mouth and pharynx	2	74.8338	2	42.8935
41153	33 - Other OR therapeutic procedures on nose, mouth and pharynx	2	74.8338	2	42.8935
41155	33 - Other OR therapeutic procedures on nose, mouth and pharynx	2	74.8338	1	78.7781
41599	33 - Other OR therapeutic procedures on nose, mouth and pharynx	2	74.8338	2	42.8935
41806	29 - Oral and Dental Services	3	81.4145	3	53.5991
41825	29 - Oral and Dental Services	3	81.4145	3	53.5991
41826	29 - Oral and Dental Services	3	81.4145	3	53.5991
41830	29 - Oral and Dental Services	3	81.4145	3	53.5991
41850	29 - Oral and Dental Services	3	81.4145	3	53.5991
42104	33 - Other OR therapeutic procedures on nose, mouth and pharynx	2	74.8338	2	42.8935
42106	33 - Other OR therapeutic procedures on nose, mouth and pharynx	2	74.8338	2	42.8935
42107	33 - Other OR therapeutic procedures on nose, mouth and pharynx	2	74.8338	2	42.8935
42120	33 - Other OR therapeutic procedures on nose, mouth and pharynx	2	74.8338	2	42.8935
42140	33 - Other OR therapeutic procedures on nose, mouth and pharynx	2	74.8338	1	0
42145	33 - Other OR therapeutic procedures on nose, mouth and pharynx	1	0	1	22.8693
42160	33 - Other OR therapeutic procedures on nose, mouth and pharynx	2	74.8338	2	42.8935
42200	33 - Other OR therapeutic procedures on nose, mouth and pharynx	2	74.8338	2	42.8935
42210	33 - Other OR therapeutic procedures on nose, mouth and pharynx	2	74.8338	2	42.8935
42215	33 - Other OR therapeutic procedures on nose, mouth and pharynx	2	74.8338	2	42.8935
42225	33 - Other OR therapeutic procedures on nose, mouth and pharynx	2	74.8338	2	42.8935
42299	33 - Other OR therapeutic procedures on nose, mouth and pharynx	2	74.8338	2	42.8935
42300	33 - Other OR therapeutic procedures on nose, mouth and pharynx	2	74.8338	2	42.8935
42305	33 - Other OR therapeutic procedures on nose, mouth and pharynx	2	74.8338	2	42.8935
42330	33 - Other OR therapeutic procedures on nose, mouth and pharynx	2	74.8338	2	42.8935
42335	33 - Other OR therapeutic procedures on nose, mouth and pharynx	2	74.8338	2	42.8935
42340	33 - Other OR therapeutic procedures on nose, mouth and pharynx	2	74.8338	2	42.8935
42408	33 - Other OR therapeutic procedures on nose, mouth and pharynx	2	74.8338	2	42.8935
42409	33 - Other OR therapeutic procedures on nose, mouth and pharynx	2	74.8338	2	42.8935
42410	33 - Other OR therapeutic procedures on nose, mouth and pharynx	2	74.8338	1	26.2594
42415	33 - Other OR therapeutic procedures on nose, mouth and pharynx	1	0	1	17.6528
42420	33 - Other OR therapeutic procedures on nose, mouth and pharynx	1	0	1	23.0109
42425	33 - Other OR therapeutic procedures on nose, mouth and pharynx	2	74.8338	2	42.8935
42426	33 - Other OR therapeutic procedures on nose, mouth and pharynx	2	74.8338	1	0
42440	33 - Other OR therapeutic procedures on nose, mouth and pharynx	1	0	1	0
42450	33 - Other OR therapeutic procedures on nose, mouth and pharynx	2	74.8338	2	42.8935
42500	33 - Other OR therapeutic procedures on nose, mouth and pharynx	2	74.8338	2	42.8935
42507	33 - Other OR therapeutic procedures on nose, mouth and pharynx	2	74.8338	2	42.8935
42510	33 - Other OR therapeutic procedures on nose, mouth and pharynx	2	74.8338	2	42.8935
42699	33 - Other OR therapeutic procedures on nose, mouth and pharynx	2	74.8338	2	42.8935
42700	33 - Other OR therapeutic procedures on nose, mouth and pharynx	2	74.8338	1	31.943
42720	33 - Other OR therapeutic procedures on nose, mouth and pharynx	2	74.8338	2	42.8935
42725	33 - Other OR therapeutic procedures on nose, mouth and pharynx	2	74.8338	2	42.8935
42808	33 - Other OR therapeutic procedures on nose, mouth and pharynx	2	74.8338	2	42.8935
42809	229 - Nonoperative removal of foreign body	3	81.4145	3	53.5991
42810	33 - Other OR therapeutic procedures on nose, mouth and pharynx	2	74.8338	2	42.8935
42815	33 - Other OR therapeutic procedures on nose, mouth and pharynx	2	74.8338	1	0
42821	30 - Tonsillectomy and/or adenoidectomy	1	0	1	21.4284
42826	30 - Tonsillectomy and/or adenoidectomy	1	0	1	16.337
42831	30 - Tonsillectomy and/or adenoidectomy	3	81.4145	1	0
42836	30 - Tonsillectomy and/or adenoidectomy	3	81.4145	3	53.5991
42842	33 - Other OR therapeutic procedures on nose, mouth and pharynx	2	74.8338	2	42.8935
42845	33 - Other OR therapeutic procedures on nose, mouth and pharynx	2	74.8338	2	42.8935
42870	30 - Tonsillectomy and/or adenoidectomy	3	81.4145	3	53.5991
42890	33 - Other OR therapeutic procedures on nose, mouth and pharynx	2	74.8338	2	42.8935
42892	33 - Other OR therapeutic procedures on nose, mouth and pharynx	2	74.8338	2	42.8935
42894	33 - Other OR therapeutic procedures on nose, mouth and pharynx	2	74.8338	2	42.8935
42950	33 - Other OR therapeutic procedures on nose, mouth and pharynx	2	74.8338	2	42.8935
42953	33 - Other OR therapeutic procedures on nose, mouth and pharynx	2	74.8338	2	42.8935
42960	32 - Other non-OR therapeutic procedures on nose, mouth and pharynx	3	81.4145	3	53.5991
42961	33 - Other OR therapeutic procedures on nose, mouth and pharynx	2	74.8338	2	42.8935
42962	33 - Other OR therapeutic procedures on nose, mouth and pharynx	2	74.8338	2	42.8935
42972	33 - Other OR therapeutic procedures on nose, mouth and pharynx	2	74.8338	2	42.8935
42999	33 - Other OR therapeutic procedures on nose, mouth and pharynx	2	74.8338	2	42.8935
43020	94 - Other OR upper GI therapeutic procedures	2	85.0607	2	76.998
43030	33 - Other OR therapeutic procedures on nose, mouth and pharynx	2	74.8338	1	50.2907
43045	94 - Other OR upper GI therapeutic procedures	2	85.0607	2	76.998
43100	94 - Other OR upper GI therapeutic procedures	2	85.0607	2	76.998
43101	94 - Other OR upper GI therapeutic procedures	2	85.0607	2	76.998
43107	94 - Other OR upper GI therapeutic procedures	1	81.6668	1	80.5602
43108	94 - Other OR upper GI therapeutic procedures	2	85.0607	2	76.998
43112	94 - Other OR upper GI therapeutic procedures	1	82.1531	1	79.049
43113	94 - Other OR upper GI therapeutic procedures	2	85.0607	2	76.998
43116	94 - Other OR upper GI therapeutic procedures	2	85.0607	2	76.998
43117	94 - Other OR upper GI therapeutic procedures	1	85.9209	1	83.5159
43118	94 - Other OR upper GI therapeutic procedures	2	85.0607	2	76.998
43121	94 - Other OR upper GI therapeutic procedures	2	85.0607	2	76.998
43122	94 - Other OR upper GI therapeutic procedures	1	79.3015	1	75.1243
43123	94 - Other OR upper GI therapeutic procedures	2	85.0607	2	76.998
43124	94 - Other OR upper GI therapeutic procedures	2	85.0607	2	76.998
43130	94 - Other OR upper GI therapeutic procedures	2	85.0607	1	40.703
43135	94 - Other OR upper GI therapeutic procedures	2	85.0607	2	76.998
43238	70 - Upper gastrointestinal endoscopy, biopsy	3	81.4145	3	53.5991
43280	94 - Other OR upper GI therapeutic procedures	1	66.1844	1	31.6517
43289	87 - Laparoscopy	1	74.8914	1	46.4602
43300	94 - Other OR upper GI therapeutic procedures	2	85.0607	2	76.998
43310	94 - Other OR upper GI therapeutic procedures	2	85.0607	2	76.998
43312	94 - Other OR upper GI therapeutic procedures	2	85.0607	2	76.998
43320	94 - Other OR upper GI therapeutic procedures	2	85.0607	2	76.998
43324	94 - Other OR upper GI therapeutic procedures	1	78.3056	1	53.5468
43325	94 - Other OR upper GI therapeutic procedures	2	85.0607	1	47.0716
43326	94 - Other OR upper GI therapeutic procedures	2	85.0607	1	56.1231
43330	94 - Other OR upper GI therapeutic procedures	1	0	1	31.1339
43331	94 - Other OR upper GI therapeutic procedures	2	85.0607	2	76.998
43340	94 - Other OR upper GI therapeutic procedures	2	85.0607	2	76.998
43341	94 - Other OR upper GI therapeutic procedures	2	85.0607	2	76.998
43350	94 - Other OR upper GI therapeutic procedures	2	85.0607	2	76.998
43351	94 - Other OR upper GI therapeutic procedures	2	85.0607	2	76.998
43352	94 - Other OR upper GI therapeutic procedures	2	85.0607	2	76.998
43360	94 - Other OR upper GI therapeutic procedures	2	85.0607	2	76.998
43361	94 - Other OR upper GI therapeutic procedures	2	85.0607	2	76.998
43400	68 - Injection or ligation of esophageal varices	3	81.4145	3	53.5991
43401	94 - Other OR upper GI therapeutic procedures	2	85.0607	2	76.998
43405	94 - Other OR upper GI therapeutic procedures	2	85.0607	2	76.998
43410	94 - Other OR upper GI therapeutic procedures	2	85.0607	2	76.998
43415	94 - Other OR upper GI therapeutic procedures	2	85.0607	1	90.0447
43420	94 - Other OR upper GI therapeutic procedures	2	85.0607	2	76.998
43425	94 - Other OR upper GI therapeutic procedures	2	85.0607	2	76.998
43496	75 - Small bowel resection	2	87.651	2	57.1079
43500	94 - Other OR upper GI therapeutic procedures	2	85.0607	1	68.819
43501	94 - Other OR upper GI therapeutic procedures	1	96.5842	1	85.109
43502	94 - Other OR upper GI therapeutic procedures	2	85.0607	2	76.998
43510	69 - Esophageal dilatation	3	81.4145	3	53.5991
43520	94 - Other OR upper GI therapeutic procedures	2	85.0607	2	76.998
43605	89 - Exploratory laparotomy	3	81.4145	1	57.1079
43610	94 - Other OR upper GI therapeutic procedures	1	89.0161	1	64.4641
43611	94 - Other OR upper GI therapeutic procedures	1	80.141	1	50.0107
43620	74 - Gastrectomy, partial and total	1	92.0595	1	80.6651
43621	74 - Gastrectomy, partial and total	1	85.5199	1	70.7839
43622	74 - Gastrectomy, partial and total	2	80.8865	1	71.772
43631	74 - Gastrectomy, partial and total	1	83.4343	1	60.0762
43632	74 - Gastrectomy, partial and total	1	88.0867	1	67.3156
43633	74 - Gastrectomy, partial and total	1	84.8985	1	67.316
43634	74 - Gastrectomy, partial and total	2	80.8865	2	66.5233
43635	94 - Other OR upper GI therapeutic procedures	2	85.0607	2	76.998
43638	74 - Gastrectomy, partial and total	2	80.8865	2	66.5233
43639	74 - Gastrectomy, partial and total	2	80.8865	2	66.5233
43640	94 - Other OR upper GI therapeutic procedures	1	93.1541	1	78.9564
43641	94 - Other OR upper GI therapeutic procedures	2	85.0607	2	76.998
43644	244 - Gastric bypass and volume reduction	1	65.4258	1	31.8226
43645	244 - Gastric bypass and volume reduction	1	0	1	31.7408
43651	94 - Other OR upper GI therapeutic procedures	2	85.0607	2	76.998
43652	94 - Other OR upper GI therapeutic procedures	2	85.0607	2	76.998
43659	87 - Laparoscopy	1	74.4151	1	40.5946
43770	244 - Gastric bypass and volume reduction	1	58.6042	1	19.8945
43771	244 - Gastric bypass and volume reduction	1	0	1	26.7974
43772	244 - Gastric bypass and volume reduction	1	74.5542	1	36.9705
43773	244 - Gastric bypass and volume reduction	1	0	1	19.7591
43774	244 - Gastric bypass and volume reduction	1	0	1	28.9739
43800	94 - Other OR upper GI therapeutic procedures	1	87.3047	1	62.3106
43810	94 - Other OR upper GI therapeutic procedures	2	85.0607	2	76.998
43820	94 - Other OR upper GI therapeutic procedures	1	91.4616	1	70.8923
43825	94 - Other OR upper GI therapeutic procedures	2	85.0607	1	71.5747
43832	71 - Gastrostomy, temporary and permanent	1	96.4329	1	78.4265
43840	94 - Other OR upper GI therapeutic procedures	1	94.1606	1	79.1899
43842	244 - Gastric bypass and volume reduction	1	70.3926	1	37.0184
43843	244 - Gastric bypass and volume reduction	1	68.7279	1	35.2431
43845	244 - Gastric bypass and volume reduction	1	77.6027	1	51.2826
43846	244 - Gastric bypass and volume reduction	1	73.9362	1	43.3381
43847	244 - Gastric bypass and volume reduction	1	0	1	37.2195
43848	244 - Gastric bypass and volume reduction	1	74.8002	1	60.6794
43850	94 - Other OR upper GI therapeutic procedures	2	85.0607	1	48.7541
43855	94 - Other OR upper GI therapeutic procedures	2	85.0607	2	76.998
43860	94 - Other OR upper GI therapeutic procedures	1	85.4182	1	66.8804
43865	94 - Other OR upper GI therapeutic procedures	2	85.0607	1	50.7063
43870	94 - Other OR upper GI therapeutic procedures	1	90.5619	1	68.5912
43880	94 - Other OR upper GI therapeutic procedures	2	85.0607	1	54.9508
43886	244 - Gastric bypass and volume reduction	1	0	1	23.8582
43887	244 - Gastric bypass and volume reduction	2	0	3	53.5991
43888	244 - Gastric bypass and volume reduction	2	0	1	0
43999	94 - Other OR upper GI therapeutic procedures	1	82.3343	1	54.2476
44005	90 - Excision, lysis peritoneal adhesions	1	86.5354	1	61.5818
44010	92 - Other bowel diagnostic procedures	2	84.3679	1	70.8443
44020	92 - Other bowel diagnostic procedures	1	88.9132	1	64.7843
44021	96 - Other OR lower GI therapeutic procedures	2	78.164	1	77.3923
44025	92 - Other bowel diagnostic procedures	2	84.3679	1	65.8994
44050	96 - Other OR lower GI therapeutic procedures	1	85.0528	1	55.8095
44055	96 - Other OR lower GI therapeutic procedures	1	76.0276	1	46.7619
44110	79 - Local excision of large intestine lesion (not endoscopic)	1	82.857	1	58.8034
44111	79 - Local excision of large intestine lesion (not endoscopic)	3	81.4145	1	76.5261
44120	75 - Small bowel resection	1	90.3359	1	73.3549
44121	75 - Small bowel resection	2	87.651	1	78.8917
44125	75 - Small bowel resection	1	95.4323	1	82.0684
44126	75 - Small bowel resection	2	87.651	2	57.1079
44127	75 - Small bowel resection	2	87.651	2	57.1079
44128	75 - Small bowel resection	2	87.651	2	57.1079
44130	73 - Ileostomy and other enterostomy	1	91.1604	1	70.4336
44139	78 - Colorectal resection	1	81.393	1	68.819
44140	78 - Colorectal resection	1	85.7405	1	61.7555
44141	78 - Colorectal resection	1	93.3114	1	78.2362
44143	78 - Colorectal resection	1	92.5574	1	78.3864
44144	78 - Colorectal resection	1	95.6818	1	83.5974
44145	78 - Colorectal resection	1	77.9332	1	55.2028
44146	78 - Colorectal resection	1	81.6232	1	62.7072
44147	78 - Colorectal resection	1	86.2063	1	59.5968
44150	78 - Colorectal resection	1	94.0469	1	82.1407
44151	78 - Colorectal resection	2	84.6253	1	89.6988
44152	78 - Colorectal resection	2	84.6253	1	73.3196
44153	78 - Colorectal resection	1	0	1	58.7377
44155	78 - Colorectal resection	1	89.3671	1	73.0606
44156	78 - Colorectal resection	2	84.6253	1	74.1331
44157	78 - Colorectal resection	1	86.013	1	69.6011
44158	78 - Colorectal resection	1	72.7006	1	62.3866
44160	78 - Colorectal resection	1	85.7856	1	62.9216
44180	96 - Other OR lower GI therapeutic procedures	1	75.2103	1	40.5466
44186	73 - Ileostomy and other enterostomy	3	81.4145	1	68.819
44187	73 - Ileostomy and other enterostomy	1	85.065	1	58.7654
44188	72 - Colostomy, temporary and permanent	1	84.3648	1	55.5237
44200	90 - Excision, lysis peritoneal adhesions	1	0	1	46.2633
44202	75 - Small bowel resection	1	84.2096	1	52.1015
44203	75 - Small bowel resection	2	87.651	2	57.1079
44204	78 - Colorectal resection	1	76.1606	1	44.7521
44205	78 - Colorectal resection	1	75.1901	1	47.2445
44206	78 - Colorectal resection	1	84.4689	1	65.0346
44207	78 - Colorectal resection	1	74.6599	1	42.4374
44208	78 - Colorectal resection	1	82.1958	1	56.3849
44210	78 - Colorectal resection	1	80.5484	1	57.1452
44211	78 - Colorectal resection	1	67.7191	1	51.9563
44212	78 - Colorectal resection	1	77.705	1	53.0705
44213	78 - Colorectal resection	1	83.4542	1	52.3431
44227	96 - Other OR lower GI therapeutic procedures	1	77.809	1	45.9535
44238	87 - Laparoscopy	1	77.3255	1	44.8219
44239	87 - Laparoscopy	2	0	3	53.5991
44310	73 - Ileostomy and other enterostomy	1	92.3239	1	74.4526
44312	73 - Ileostomy and other enterostomy	1	75.1901	1	49.6742
44314	73 - Ileostomy and other enterostomy	1	85.0383	1	62.2991
44316	73 - Ileostomy and other enterostomy	3	81.4145	1	74.1331
44320	72 - Colostomy, temporary and permanent	1	91.3824	1	72.0717
44322	72 - Colostomy, temporary and permanent	2	93.2204	2	65.6865
44340	72 - Colostomy, temporary and permanent	1	82.785	1	50.2417
44345	72 - Colostomy, temporary and permanent	1	79.3555	1	54.2476
44346	86 - Other hernia repair	1	80.1519	1	59.7886
44602	96 - Other OR lower GI therapeutic procedures	1	93.5819	1	78.639
44603	96 - Other OR lower GI therapeutic procedures	1	90.0387	1	85.6226
44604	96 - Other OR lower GI therapeutic procedures	1	89.8606	1	75.4397
44605	72 - Colostomy, temporary and permanent	2	93.2204	1	82.6677
44615	94 - Other OR upper GI therapeutic procedures	1	83.9981	1	63.8859
44620	96 - Other OR lower GI therapeutic procedures	1	74.0359	1	47.5608
44625	96 - Other OR lower GI therapeutic procedures	1	75.7588	1	49.7232
44626	96 - Other OR lower GI therapeutic procedures	1	74.1873	1	54.0028
44640	96 - Other OR lower GI therapeutic procedures	1	82.0012	1	73.7624
44650	96 - Other OR lower GI therapeutic procedures	1	84.9984	1	72.2861
44660	96 - Other OR lower GI therapeutic procedures	2	78.164	1	45.8794
44661	75 - Small bowel resection	1	72.1869	1	54.8127
44680	96 - Other OR lower GI therapeutic procedures	2	78.164	2	46.2243
44700	96 - Other OR lower GI therapeutic procedures	2	78.164	2	46.2243
44701	96 - Other OR lower GI therapeutic procedures	2	78.164	2	46.2243
44799	96 - Other OR lower GI therapeutic procedures	1	87.3141	1	72.8681
44800	96 - Other OR lower GI therapeutic procedures	1	0	1	41.6842
44820	96 - Other OR lower GI therapeutic procedures	1	0	1	39.9157
44850	96 - Other OR lower GI therapeutic procedures	2	78.164	2	46.2243
44899	96 - Other OR lower GI therapeutic procedures	2	78.164	2	46.2243
44900	96 - Other OR lower GI therapeutic procedures	2	78.164	1	49.4986
44950	80 - Appendectomy	1	69.2664	1	35.5494
44955	80 - Appendectomy	1	0	1	51.9987
44960	80 - Appendectomy	1	76.0834	1	57.6283
44970	80 - Appendectomy	1	62.6032	1	33.3438
44979	80 - Appendectomy	3	81.4145	1	26.2594
45000	96 - Other OR lower GI therapeutic procedures	1	77.423	1	45.6921
45005	96 - Other OR lower GI therapeutic procedures	1	72.8591	1	39.4405
45020	96 - Other OR lower GI therapeutic procedures	1	83.4542	1	40.2456
45108	96 - Other OR lower GI therapeutic procedures	2	78.164	2	46.2243
45110	78 - Colorectal resection	1	76.1236	1	60.1721
45111	78 - Colorectal resection	1	76.3336	1	57.4961
45112	78 - Colorectal resection	1	70.1037	1	56.3216
45113	78 - Colorectal resection	1	0	1	58.0815
45114	78 - Colorectal resection	2	84.6253	1	46.4602
45116	78 - Colorectal resection	2	84.6253	2	50.9912
45119	78 - Colorectal resection	1	74.2723	1	52.5188
45120	78 - Colorectal resection	2	84.6253	2	50.9912
45121	78 - Colorectal resection	2	84.6253	2	50.9912
45123	78 - Colorectal resection	1	79.1077	1	42.2612
45126	78 - Colorectal resection	1	76.4794	1	68.0869
45130	78 - Colorectal resection	1	78.439	1	42.486
45135	78 - Colorectal resection	2	84.6253	2	50.9912
45136	78 - Colorectal resection	1	75.8442	1	60.6862
45150	96 - Other OR lower GI therapeutic procedures	2	78.164	2	46.2243
45160	78 - Colorectal resection	2	84.6253	1	0
45170	96 - Other OR lower GI therapeutic procedures	1	69.5038	1	28.2324
45190	95 - Other non-OR lower GI therapeutic procedures	1	73.2664	1	25.4062
45386	76 - Colonoscopy and biopsy	3	81.4145	3	53.5991
45395	78 - Colorectal resection	1	77.0053	1	48.1666
45397	78 - Colorectal resection	1	0	1	54.028
45400	96 - Other OR lower GI therapeutic procedures	1	0	1	25.4597
45402	78 - Colorectal resection	1	0	1	42.6727
45499	87 - Laparoscopy	2	0	1	32.784
45500	76 - Colonoscopy and biopsy	3	81.4145	3	53.5991
45505	76 - Colonoscopy and biopsy	3	81.4145	1	0
45540	96 - Other OR lower GI therapeutic procedures	1	0	1	40.8602
45541	96 - Other OR lower GI therapeutic procedures	1	79.1425	1	37.2616
45550	78 - Colorectal resection	1	75.2714	1	52.1354
45560	129 - Repair of cystocele and rectocele, obliteration of vaginal vault	1	0	1	0
45562	96 - Other OR lower GI therapeutic procedures	2	78.164	1	68.819
45563	72 - Colostomy, temporary and permanent	2	93.2204	2	65.6865
45800	96 - Other OR lower GI therapeutic procedures	2	78.164	2	46.2243
45805	72 - Colostomy, temporary and permanent	2	93.2204	2	65.6865
45820	96 - Other OR lower GI therapeutic procedures	2	78.164	1	45.8794
45825	72 - Colostomy, temporary and permanent	2	93.2204	2	65.6865
45900	96 - Other OR lower GI therapeutic procedures	2	78.164	2	46.2243
45905	96 - Other OR lower GI therapeutic procedures	1	0	1	21.4015
45910	96 - Other OR lower GI therapeutic procedures	1	74.3183	1	26.897
45990	97 - Other gastrointestinal diagnostic procedures	1	75.6082	1	36.3028
45999	96 - Other OR lower GI therapeutic procedures	1	75.0835	1	39.2594
46020	96 - Other OR lower GI therapeutic procedures	1	0	1	18.379
46030	96 - Other OR lower GI therapeutic procedures	2	78.164	1	0
46040	96 - Other OR lower GI therapeutic procedures	1	72.1146	1	37.2112
46045	96 - Other OR lower GI therapeutic procedures	1	72.1869	1	32.4938
46060	96 - Other OR lower GI therapeutic procedures	1	74.7129	1	32.2989
46505	96 - Other OR lower GI therapeutic procedures	2	78.164	2	46.2243
46700	96 - Other OR lower GI therapeutic procedures	1	0	1	22.148
46706	96 - Other OR lower GI therapeutic procedures	1	0	1	0
46710	96 - Other OR lower GI therapeutic procedures	2	78.164	2	46.2243
46712	96 - Other OR lower GI therapeutic procedures	2	78.164	2	46.2243
46715	96 - Other OR lower GI therapeutic procedures	2	78.164	2	46.2243
46716	96 - Other OR lower GI therapeutic procedures	2	78.164	2	46.2243
46735	96 - Other OR lower GI therapeutic procedures	2	78.164	2	46.2243
46740	96 - Other OR lower GI therapeutic procedures	2	78.164	2	46.2243
46744	132 - Other OR therapeutic procedures, female organs	2	72.6833	2	40.3807
46748	132 - Other OR therapeutic procedures, female organs	2	72.6833	2	40.3807
46750	96 - Other OR lower GI therapeutic procedures	1	0	1	24.7733
46751	96 - Other OR lower GI therapeutic procedures	2	78.164	2	46.2243
46753	96 - Other OR lower GI therapeutic procedures	2	78.164	2	46.2243
46760	96 - Other OR lower GI therapeutic procedures	2	78.164	2	46.2243
46761	96 - Other OR lower GI therapeutic procedures	2	78.164	1	39.287
46762	96 - Other OR lower GI therapeutic procedures	2	78.164	1	33.0847
46922	95 - Other non-OR lower GI therapeutic procedures	1	0	1	0
46924	95 - Other non-OR lower GI therapeutic procedures	1	0	1	23.0589
46940	95 - Other non-OR lower GI therapeutic procedures	3	81.4145	1	33.7211
46942	95 - Other non-OR lower GI therapeutic procedures	3	81.4145	3	53.5991
46947	81 - Hemorrhoid procedures	1	64.5201	1	12.1271
46999	96 - Other OR lower GI therapeutic procedures	1	76.8604	1	35.2231
47001	83 - Biopsy of liver	3	81.4145	3	53.5991
47010	99 - Other OR gastrointestinal therapeutic procedures	2	87.8447	1	64.7051
47015	99 - Other OR gastrointestinal therapeutic procedures	2	87.8447	2	76.3712
47120	99 - Other OR gastrointestinal therapeutic procedures	1	80.2416	1	57.2292
47122	99 - Other OR gastrointestinal therapeutic procedures	1	87.6614	1	70.0322
47125	99 - Other OR gastrointestinal therapeutic procedures	1	74.8846	1	58.3762
47130	99 - Other OR gastrointestinal therapeutic procedures	1	83.1155	1	66.959
47140	176 - Other organ transplantation	3	81.4145	3	53.5991
47142	176 - Other organ transplantation	3	81.4145	3	53.5991
47300	99 - Other OR gastrointestinal therapeutic procedures	2	87.8447	1	43.8145
47350	99 - Other OR gastrointestinal therapeutic procedures	2	87.8447	2	76.3712
47360	99 - Other OR gastrointestinal therapeutic procedures	2	87.8447	2	76.3712
47361	99 - Other OR gastrointestinal therapeutic procedures	2	87.8447	2	76.3712
47362	99 - Other OR gastrointestinal therapeutic procedures	2	87.8447	2	76.3712
47370	99 - Other OR gastrointestinal therapeutic procedures	1	82.3255	1	41.3271
47371	99 - Other OR gastrointestinal therapeutic procedures	2	87.8447	2	76.3712
47379	99 - Other OR gastrointestinal therapeutic procedures	1	78.8114	1	40.9911
47380	99 - Other OR gastrointestinal therapeutic procedures	1	81.7549	1	55.1849
47381	99 - Other OR gastrointestinal therapeutic procedures	2	87.8447	2	76.3712
47382	99 - Other OR gastrointestinal therapeutic procedures	2	87.8447	1	47.7165
47399	99 - Other OR gastrointestinal therapeutic procedures	2	87.8447	1	53.8835
47400	84 - Cholecystectomy and common duct exploration	3	81.4145	2	68.1168
47420	84 - Cholecystectomy and common duct exploration	1	86.9044	1	63.3623
47425	84 - Cholecystectomy and common duct exploration	3	81.4145	2	68.1168
47460	84 - Cholecystectomy and common duct exploration	1	0	1	52.9137
47480	99 - Other OR gastrointestinal therapeutic procedures	1	94.8422	1	65.1901
47490	99 - Other OR gastrointestinal therapeutic procedures	2	87.8447	2	76.3712
47500	226 - Other diagnostic radiology and related techniques	3	81.4145	3	53.5991
47550	84 - Cholecystectomy and common duct exploration	3	81.4145	2	68.1168
47560	97 - Other gastrointestinal diagnostic procedures	2	84.477	1	46.4602
47561	97 - Other gastrointestinal diagnostic procedures	2	84.477	3	53.5991
47562	84 - Cholecystectomy and common duct exploration	1	67.7034	1	27.5998
47563	84 - Cholecystectomy and common duct exploration	1	68.0624	1	29.0924
47564	84 - Cholecystectomy and common duct exploration	1	68.287	1	29.109
47570	99 - Other OR gastrointestinal therapeutic procedures	2	87.8447	1	34.0584
47579	87 - Laparoscopy	2	0	1	43.8145
47600	84 - Cholecystectomy and common duct exploration	1	82.485	1	55.7749
47605	84 - Cholecystectomy and common duct exploration	1	81.4292	1	53.4252
47610	84 - Cholecystectomy and common duct exploration	1	87.7961	1	59.9179
47612	84 - Cholecystectomy and common duct exploration	1	0	1	52.2438
47620	84 - Cholecystectomy and common duct exploration	3	81.4145	1	60.119
47630	84 - Cholecystectomy and common duct exploration	3	81.4145	2	68.1168
47700	97 - Other gastrointestinal diagnostic procedures	2	84.477	3	53.5991
47701	99 - Other OR gastrointestinal therapeutic procedures	2	87.8447	2	76.3712
47711	99 - Other OR gastrointestinal therapeutic procedures	2	87.8447	1	72.2169
47712	99 - Other OR gastrointestinal therapeutic procedures	2	87.8447	2	76.3712
47715	99 - Other OR gastrointestinal therapeutic procedures	2	87.8447	2	76.3712
47720	99 - Other OR gastrointestinal therapeutic procedures	2	87.8447	1	66.5233
47721	99 - Other OR gastrointestinal therapeutic procedures	2	87.8447	2	76.3712
47740	99 - Other OR gastrointestinal therapeutic procedures	2	87.8447	1	53.7406
47741	99 - Other OR gastrointestinal therapeutic procedures	2	87.8447	1	74.0231
47760	99 - Other OR gastrointestinal therapeutic procedures	1	87.0834	1	60.119
47765	99 - Other OR gastrointestinal therapeutic procedures	2	87.8447	1	74.1331
47780	99 - Other OR gastrointestinal therapeutic procedures	1	82.8781	1	60.7275
47785	99 - Other OR gastrointestinal therapeutic procedures	1	83.4455	1	66.4164
47800	99 - Other OR gastrointestinal therapeutic procedures	2	87.8447	1	67.8889
47802	73 - Ileostomy and other enterostomy	3	81.4145	3	53.5991
47900	99 - Other OR gastrointestinal therapeutic procedures	2	87.8447	1	63.8859
47999	99 - Other OR gastrointestinal therapeutic procedures	2	87.8447	2	76.3712
48000	99 - Other OR gastrointestinal therapeutic procedures	2	87.8447	2	76.3712
48001	73 - Ileostomy and other enterostomy	3	81.4145	3	53.5991
48005	99 - Other OR gastrointestinal therapeutic procedures	1	92.391	1	93.9266
48020	99 - Other OR gastrointestinal therapeutic procedures	2	87.8447	2	76.3712
48100	97 - Other gastrointestinal diagnostic procedures	2	84.477	1	52.2778
48105	99 - Other OR gastrointestinal therapeutic procedures	1	88.7643	1	89.1651
48120	99 - Other OR gastrointestinal therapeutic procedures	1	0	1	61.7078
48140	99 - Other OR gastrointestinal therapeutic procedures	1	77.7897	1	64.9876
48145	99 - Other OR gastrointestinal therapeutic procedures	1	77.423	1	65.766
48146	99 - Other OR gastrointestinal therapeutic procedures	2	87.8447	1	67.6323
48148	99 - Other OR gastrointestinal therapeutic procedures	2	87.8447	1	56.0598
48150	73 - Ileostomy and other enterostomy	1	83.1447	1	71.1746
48152	73 - Ileostomy and other enterostomy	1	88.5227	1	74.6408
48153	73 - Ileostomy and other enterostomy	1	81.5495	1	66.9072
48154	73 - Ileostomy and other enterostomy	1	88.8109	1	73.4384
48155	99 - Other OR gastrointestinal therapeutic procedures	1	83.9604	1	74.2596
48160	176 - Other organ transplantation	3	81.4145	1	82.7598
48180	99 - Other OR gastrointestinal therapeutic procedures	2	87.8447	1	65.766
48500	99 - Other OR gastrointestinal therapeutic procedures	2	87.8447	2	76.3712
48510	99 - Other OR gastrointestinal therapeutic procedures	1	86.7301	1	67.4423
48511	99 - Other OR gastrointestinal therapeutic procedures	2	87.8447	2	76.3712
48520	99 - Other OR gastrointestinal therapeutic procedures	1	76.8604	1	64.0047
48540	99 - Other OR gastrointestinal therapeutic procedures	1	0	1	59.9529
48545	99 - Other OR gastrointestinal therapeutic procedures	2	87.8447	2	76.3712
48547	99 - Other OR gastrointestinal therapeutic procedures	2	87.8447	2	76.3712
48548	99 - Other OR gastrointestinal therapeutic procedures	1	73.623	1	58.471
48999	99 - Other OR gastrointestinal therapeutic procedures	1	79.8757	1	62.5755
49000	89 - Exploratory laparotomy	1	93.8177	1	74.8646
49002	89 - Exploratory laparotomy	1	96.1485	1	91.5797
49010	89 - Exploratory laparotomy	1	89.8727	1	67.3005
49020	99 - Other OR gastrointestinal therapeutic procedures	1	91.3301	1	77.8048
49021	99 - Other OR gastrointestinal therapeutic procedures	2	87.8447	1	68.1168
49040	99 - Other OR gastrointestinal therapeutic procedures	1	84.1901	1	65.6134
49041	99 - Other OR gastrointestinal therapeutic procedures	2	87.8447	2	76.3712
49060	99 - Other OR gastrointestinal therapeutic procedures	1	90.7715	1	77.9742
49061	99 - Other OR gastrointestinal therapeutic procedures	2	87.8447	2	76.3712
49062	67 - Other therapeutic procedures, hemic and lymphatic system	2	76.5063	2	43.2038
49080	88 - Abdominal paracentesis	1	92.0099	1	80.3467
49081	88 - Abdominal paracentesis	3	81.4145	2	87.9454
49085	99 - Other OR gastrointestinal therapeutic procedures	2	87.8447	1	49.1207
49200	99 - Other OR gastrointestinal therapeutic procedures	1	80.2122	1	47.8274
49201	99 - Other OR gastrointestinal therapeutic procedures	1	78.5855	1	55.4788
49203	99 - Other OR gastrointestinal therapeutic procedures	1	78.4506	1	50.0953
49204	99 - Other OR gastrointestinal therapeutic procedures	1	73.2281	1	49.6271
49205	99 - Other OR gastrointestinal therapeutic procedures	1	77.83	1	59.13
49215	99 - Other OR gastrointestinal therapeutic procedures	1	0	1	48.9727
49220	89 - Exploratory laparotomy	3	81.4145	3	53.5991
49250	99 - Other OR gastrointestinal therapeutic procedures	2	87.8447	1	27.0322
49255	99 - Other OR gastrointestinal therapeutic procedures	1	89.826	1	66.1126
49321	87 - Laparoscopy	1	85.1735	1	48.3907
49322	87 - Laparoscopy	1	81.5765	1	45.6689
49323	67 - Other therapeutic procedures, hemic and lymphatic system	2	76.5063	1	41.3052
49324	87 - Laparoscopy	1	77.2168	1	40.5601
49325	87 - Laparoscopy	1	77.3448	1	50.0879
49329	87 - Laparoscopy	1	74.8304	1	42.3709
49402	99 - Other OR gastrointestinal therapeutic procedures	1	78.9366	1	51.9745
49425	99 - Other OR gastrointestinal therapeutic procedures	2	87.8447	1	75.2263
49426	99 - Other OR gastrointestinal therapeutic procedures	2	87.8447	2	76.3712
49428	99 - Other OR gastrointestinal therapeutic procedures	2	87.8447	2	76.3712
49429	99 - Other OR gastrointestinal therapeutic procedures	2	87.8447	2	76.3712
49491	85 - Inguinal and femoral hernia repair	2	75.3262	3	53.5991
49495	85 - Inguinal and femoral hernia repair	2	75.3262	3	53.5991
49496	85 - Inguinal and femoral hernia repair	2	75.3262	3	53.5991
49500	85 - Inguinal and femoral hernia repair	2	75.3262	3	53.5991
49501	85 - Inguinal and femoral hernia repair	2	75.3262	3	53.5991
49505	85 - Inguinal and femoral hernia repair	1	62.9863	1	19.8269
49507	85 - Inguinal and femoral hernia repair	1	76.9384	1	35.2019
49520	85 - Inguinal and femoral hernia repair	1	64.0637	1	22.9012
49521	85 - Inguinal and femoral hernia repair	1	82.534	1	38.6962
49525	85 - Inguinal and femoral hernia repair	1	65.3854	1	20.3042
49540	86 - Other hernia repair	2	78.5069	1	28.386
49550	85 - Inguinal and femoral hernia repair	1	0	1	22.7654
49553	85 - Inguinal and femoral hernia repair	1	82.8254	1	47.1176
49555	85 - Inguinal and femoral hernia repair	2	75.3262	1	30.0595
49557	85 - Inguinal and femoral hernia repair	2	75.3262	1	59.3065
49560	86 - Other hernia repair	1	69.1966	1	35.4795
49561	86 - Other hernia repair	1	75.276	1	43.3281
49565	86 - Other hernia repair	1	70.8368	1	42.7187
49566	86 - Other hernia repair	1	77.0273	1	49.5427
49568	86 - Other hernia repair	1	74.6026	1	41.9538
49570	86 - Other hernia repair	1	63.8216	1	21.0975
49572	86 - Other hernia repair	1	67.0957	1	22.5135
49580	86 - Other hernia repair	2	78.5069	1	27.7514
49582	86 - Other hernia repair	2	78.5069	1	35.1578
49585	86 - Other hernia repair	1	65.7513	1	21.9183
49587	86 - Other hernia repair	1	70.5658	1	28.2041
49590	86 - Other hernia repair	1	70.0821	1	35.1145
49600	86 - Other hernia repair	2	78.5069	2	47.7165
49605	86 - Other hernia repair	2	78.5069	2	47.7165
49606	86 - Other hernia repair	2	78.5069	2	47.7165
49650	85 - Inguinal and femoral hernia repair	1	60.5062	1	17.2771
49651	85 - Inguinal and femoral hernia repair	1	0	1	11.0358
49659	86 - Other hernia repair	1	66.8793	1	31.693
49900	99 - Other OR gastrointestinal therapeutic procedures	1	91.9746	1	83.9695
49904	99 - Other OR gastrointestinal therapeutic procedures	2	87.8447	2	76.3712
49905	99 - Other OR gastrointestinal therapeutic procedures	2	87.8447	2	76.3712
49906	99 - Other OR gastrointestinal therapeutic procedures	2	87.8447	2	76.3712
49999	99 - Other OR gastrointestinal therapeutic procedures	1	75.9505	1	35.7569
50010	103 - Nephrotomy and nephrostomy	3	81.4145	3	53.5991
50020	103 - Nephrotomy and nephrostomy	3	81.4145	3	53.5991
50045	103 - Nephrotomy and nephrostomy	3	81.4145	3	53.5991
50060	103 - Nephrotomy and nephrostomy	3	81.4145	3	53.5991
50065	103 - Nephrotomy and nephrostomy	3	81.4145	3	53.5991
50075	103 - Nephrotomy and nephrostomy	3	81.4145	3	53.5991
50130	103 - Nephrotomy and nephrostomy	3	81.4145	3	53.5991
50135	103 - Nephrotomy and nephrostomy	3	81.4145	3	53.5991
50205	110 - Other diagnostic procedures of urinary tract	3	81.4145	2	54.174
50220	104 - Nephrectomy, partial or complete	1	82.7315	1	58.9273
50225	104 - Nephrectomy, partial or complete	2	78.3887	1	64.7612
50230	104 - Nephrectomy, partial or complete	1	82.458	1	58.6618
50234	104 - Nephrectomy, partial or complete	2	78.3887	1	55.5637
50236	104 - Nephrectomy, partial or complete	2	78.3887	3	53.5991
50240	104 - Nephrectomy, partial or complete	1	0	1	47.0716
50280	112 - Other OR therapeutic procedures of urinary tract	2	77.9255	2	48.6003
50290	112 - Other OR therapeutic procedures of urinary tract	2	77.9255	2	48.6003
50370	104 - Nephrectomy, partial or complete	2	78.3887	3	53.5991
50384	111 - Other non-OR therapeutic procedures of urinary tract	3	81.4145	3	53.5991
50389	111 - Other non-OR therapeutic procedures of urinary tract	3	81.4145	3	53.5991
50400	112 - Other OR therapeutic procedures of urinary tract	2	77.9255	2	48.6003
50405	112 - Other OR therapeutic procedures of urinary tract	2	77.9255	2	48.6003
50500	112 - Other OR therapeutic procedures of urinary tract	2	77.9255	2	48.6003
50541	112 - Other OR therapeutic procedures of urinary tract	2	77.9255	2	48.6003
50542	112 - Other OR therapeutic procedures of urinary tract	2	77.9255	1	39.9157
50543	104 - Nephrectomy, partial or complete	2	78.3887	1	41.6842
50544	112 - Other OR therapeutic procedures of urinary tract	2	77.9255	1	0
50545	104 - Nephrectomy, partial or complete	1	73.623	1	35.1578
50546	104 - Nephrectomy, partial or complete	1	0	1	38.5069
50547	104 - Nephrectomy, partial or complete	2	78.3887	3	53.5991
50548	104 - Nephrectomy, partial or complete	2	78.3887	1	53.9865
50549	110 - Other diagnostic procedures of urinary tract	3	81.4145	2	54.174
50592	111 - Other non-OR therapeutic procedures of urinary tract	3	81.4145	3	53.5991
50610	112 - Other OR therapeutic procedures of urinary tract	2	77.9255	2	48.6003
50630	112 - Other OR therapeutic procedures of urinary tract	2	77.9255	2	48.6003
50650	112 - Other OR therapeutic procedures of urinary tract	2	77.9255	2	48.6003
50660	112 - Other OR therapeutic procedures of urinary tract	2	77.9255	2	48.6003
50688	111 - Other non-OR therapeutic procedures of urinary tract	3	81.4145	3	53.5991
50700	112 - Other OR therapeutic procedures of urinary tract	2	77.9255	2	48.6003
50715	112 - Other OR therapeutic procedures of urinary tract	2	77.9255	2	48.6003
50727	112 - Other OR therapeutic procedures of urinary tract	2	77.9255	2	48.6003
50728	112 - Other OR therapeutic procedures of urinary tract	2	77.9255	2	48.6003
50740	112 - Other OR therapeutic procedures of urinary tract	2	77.9255	2	48.6003
50760	112 - Other OR therapeutic procedures of urinary tract	2	77.9255	2	48.6003
50770	112 - Other OR therapeutic procedures of urinary tract	2	77.9255	2	48.6003
50780	112 - Other OR therapeutic procedures of urinary tract	2	77.9255	1	53.1836
50783	112 - Other OR therapeutic procedures of urinary tract	2	77.9255	2	48.6003
50785	112 - Other OR therapeutic procedures of urinary tract	2	77.9255	2	48.6003
50800	112 - Other OR therapeutic procedures of urinary tract	2	77.9255	2	48.6003
50810	112 - Other OR therapeutic procedures of urinary tract	2	77.9255	2	48.6003
50815	112 - Other OR therapeutic procedures of urinary tract	2	77.9255	2	48.6003
50820	112 - Other OR therapeutic procedures of urinary tract	2	77.9255	2	48.6003
50825	112 - Other OR therapeutic procedures of urinary tract	2	77.9255	2	48.6003
50830	112 - Other OR therapeutic procedures of urinary tract	2	77.9255	2	48.6003
50840	112 - Other OR therapeutic procedures of urinary tract	2	77.9255	2	48.6003
50845	112 - Other OR therapeutic procedures of urinary tract	2	77.9255	2	48.6003
50860	112 - Other OR therapeutic procedures of urinary tract	2	77.9255	2	48.6003
50900	112 - Other OR therapeutic procedures of urinary tract	2	77.9255	2	48.6003
50920	112 - Other OR therapeutic procedures of urinary tract	2	77.9255	2	48.6003
50930	112 - Other OR therapeutic procedures of urinary tract	2	77.9255	2	48.6003
50947	102 - Ureteral catheterization	3	81.4145	3	53.5991
50949	111 - Other non-OR therapeutic procedures of urinary tract	3	81.4145	3	53.5991
[truncated: 562 more rows]
